1 **IL-10 Promotes Endothelial Progenitor Cell Driven Wound Neovascularization and**  
2 **Enhances Healing via STAT3.**

3 Swathi Balaji<sup>1\*</sup> PhD, Emily Steen<sup>1</sup> MD, Xinyi Wang<sup>1</sup> PhD, Hima V. Vangapandu<sup>1</sup> PhD,  
4 Natalie Templeman<sup>1</sup> BS, Alexander J. Blum<sup>1</sup> BS, Chad M. Moles<sup>1</sup> MS, Hui Li<sup>1</sup> PhD, Daria  
5 A. Narmoneva<sup>2</sup> PhD, Timothy M. Crombleholme<sup>3,4</sup> MD, Manish J. Butte<sup>5</sup>, MD, PhD, Paul  
6 L. Bollyky<sup>6</sup> MD, D.Phil., Sundeep G. Keswani<sup>1\*</sup> MD.

7  
8 <sup>1</sup> Division of Pediatric Surgery, Department of Surgery, Texas Children's Hospital and  
9 Baylor College of Medicine, Houston, TX, 77030, USA; <sup>2</sup> Biomedical Engineering,  
10 Department of Biomedical, Chemical and Environmental Engineering, College of  
11 Engineering and Applied Sciences, University of Cincinnati, Cincinnati, OH, 45221, USA;  
12 <sup>3</sup> Center for Children's Surgery, Children's Hospital Colorado and the University of  
13 Colorado School of Medicine, Aurora, CO, 80045, USA; <sup>4</sup> Fetal Care Center Dallas, TX,  
14 75230, USA; <sup>5</sup> Division of Immunology, Allergy, and Rheumatology, Departments of  
15 Pediatrics and Microbiology, Immunology, and Molecular Genetics; University of  
16 California Los Angeles, Los Angeles, CA, 90095 USA; <sup>6</sup> Division of Infectious Diseases,  
17 Department of Medicine, Stanford University School of Medicine, Stanford, CA, 94305,  
18 USA

19 \*To whom correspondence may be addressed

20

21 The authors declare no competing financial interests.

22

23 **Corresponding authors:**

24 Swathi Balaji, PhD

25 Feigin Center, C.450.05

26 1102 Bates Avenue

27 Texas Children's Hospital and Baylor College of Medicine

28 Phone: (832) 824-0461

29 Fax: (832) 825-3141

30 Email: balaji@bcm.edu

31

32 Sundeep G. Keswani, MD FACS FAAP

33 Feigin Center, C.450.06

34 1102 Bates Avenue

35 Texas Children's Hospital and Baylor College of Medicine

36 Phone: (832) 822-3135

37 Fax: (832) 825-3141

38 Email: keswani@bcm.edu

39

40 **Short Title:** IL-10 promotes wound healing and EPC-driven neovascularization

41 **Key words**

42 Wound healing, diabetes, IL-10, angiogenesis, endothelial progenitor cells, VEGF

## 43 List of abbreviations

|    |                           |                                                                     |
|----|---------------------------|---------------------------------------------------------------------|
| 44 | $\Delta\Delta Ct$         | - Comparative Ct                                                    |
| 45 | 4-OHT                     | - 4-hydroxy tamoxifen                                               |
| 46 | AFB                       | - Adult Fibroblasts                                                 |
| 47 | ANOVA                     | - Analysis of Variance                                              |
| 48 | BGS                       | - Bovine Growth Serum                                               |
| 49 | BM                        | - Bone marrow                                                       |
| 50 | CD34                      | - cluster of differentiation 34 molecule                            |
| 51 | CD133                     | - cluster of differentiation 133 molecule (also known as Prominin1) |
| 52 | CXCR4                     | - CXC chemokine receptor type 4                                     |
| 53 | DMEM                      | - Dulbecco's Modified Eagle's Media                                 |
| 54 | ECL                       | - Enhanced Chemoluminescence                                        |
| 55 | ECs                       | - Endothelial cells                                                 |
| 56 | ECM                       | - Extracellular Matrix                                              |
| 57 | ELISA                     | - Enzyme-Linked Immunosorbent Assay                                 |
| 58 | EPCs                      | - Endothelial progenitor cells                                      |
| 59 | FLK-1                     | - Fetal Liver Kinase 1 (also known as KDR, is a receptor for VEGF)  |
| 60 | GFP                       | - Green Fluorescent Protein                                         |
| 61 | H&E                       | - Hematoxylin and Eosin                                             |
| 62 | HIF-1                     | - Hypoxia inducible factor 1                                        |
| 63 | HSCs                      | - Hematopoietic stem cells                                          |
| 64 | IgG                       | - Immunoglobulin G                                                  |
| 65 | IHC                       | - Immunohistochemistry                                              |
| 66 | IL-10                     | - Interleukin 10                                                    |
| 67 | IL-10R                    | - Interleukin 10 Receptor                                           |
| 68 | LV-GFP                    | - Lenti Virus expressing GFP                                        |
| 69 | LV-IL-10                  | - Lenti Virus expressing IL-10                                      |
| 70 | MI                        | - Myocardial Infarction                                             |
| 71 | PBS                       | - Phosphate Buffered Saline                                         |
| 72 | PSF                       | - Penicillin, Streptomycin, Amphotericin                            |
| 73 | p-STAT3                   | - Phosphorylated Signal Transducer and Activator of Transcription 3 |
| 74 | qPCR                      | - Real Time-Polymerase Chain Reaction                               |
| 75 | SDF-1 $\alpha$            | - Stromal cell-derived factor 1 $\alpha$                            |
| 76 | shRNA                     | - Short Hairpin RNA                                                 |
| 77 | STAT3                     | - Signal Transducer and Activator of Transcription 3                |
| 78 | TBS                       | - Tris-Buffered Saline\                                             |
| 79 | TGF- $\beta$ 1, $\beta$ 3 | - Transforming Growth Factor- $\beta$ 1, $\beta$ 3                  |
| 80 | Tween-20                  | - Polysorbate-20                                                    |
| 81 | VEGF                      | - Vascular endothelial growth factor                                |

82 **Abstract**

83 Evidence from prior studies of cutaneous trauma, burns, and chronic diabetic  
84 wound repair demonstrates that endothelial progenitor cells (EPCs) contribute to *de novo*  
85 angiogenesis, anti-inflammatory reactions, tissue regeneration, and remodeling. We have  
86 shown that IL-10, a potent anti-inflammatory cytokine, promotes regenerative tissue  
87 repair in an adult model of dermal scar formation via the regulation of fibroblast-specific  
88 hyaluronan synthesis in a STAT3 dependent manner. While it is known that IL-10 drives  
89 EPC recruitment and neovascularization after myocardial infarction, its specific mode of  
90 action, particularly in dermal wound healing and neovascularization in both control and  
91 diabetic wounds remains to be defined. Here we show that IL-10 promotes EPC  
92 recruitment into the dermal wound microenvironment to facilitate neovascularization and  
93 wound healing of control and diabetic (db/db) wounds via vascular endothelial growth  
94 factor (VEGF) and stromal-cell derived factor 1 (SDF-1 $\alpha$ ) signaling. Inducible skin-specific  
95 STAT3 knockout (KO) mice were studied to determine whether the impact of IL-10 on the  
96 neovascularization and wound healing is STAT3 dependent. We found that IL-10  
97 treatment significantly promotes dermal wound healing with enhanced wound closure,  
98 robust granulation tissue formation and neovascularization. This was associated with  
99 elevated wound EPC counts as well as increased VEGF and high SDF-1 $\alpha$  levels in control  
100 mice, an effect that was abrogated in STAT3 KO transgenic mice. These findings were  
101 supported *in vitro*, wherein IL-10-enhanced VEGF and SDF-1 $\alpha$  synthesis in primary  
102 murine dermal fibroblasts. IL-10-conditioned fibroblast media was shown to promote  
103 sprouting and network formation in aortic ring assays. We conclude that overexpression  
104 of IL-10 in the wound-specific milieu recruits EPCs and promote neovascularization,

105 which occurs in a STAT3-dependent manner via regulation of VEGF and SDF-1 $\alpha$  levels.  
106 Collectively, our studies demonstrate that IL-10 increases EPC recruitment leading to  
107 enhanced neovascularization and healing of dermal wounds.

## 108 **Introduction**

109           Chronic ischemic wounds are prevalent and particularly debilitating in diabetic  
110 patients, as the impaired neovascularization seen in these wounds ultimately leads to  
111 recurrent infections, a failure to heal, and even extremity amputations, all of which impose  
112 major economic healthcare burdens.<sup>1-3</sup> In contrast, physiologic dermal wound healing is  
113 characterized by a well-coordinated series of responses to injury, including granulation  
114 tissue formation, epithelial gap closure, inflammatory regulation, and robust  
115 neovascularization - a process initiated by local endothelial cells and by both circulating  
116 and tissue resident endothelial progenitor cells (EPCs) - to effectively restore circulation  
117 to the affected area and support tissue repair.<sup>4</sup>

118           Endothelial progenitor cells (EPCs) significantly contribute to wound  
119 neovascularization<sup>5-7</sup> by differentiating into mature endothelial cells<sup>8,9</sup> and forming  
120 vascular structures *de novo*, and via paracrine effects in the production of growth factors  
121 that support vascularization<sup>10,11</sup>. While the EPC phenotype continues to evolve,<sup>12</sup> CD34,  
122 CD31/PECAM1, VEGFR2/Flk1/KDR, and CD133 are archetype cell markers to define  
123 these progenitor cells.<sup>13,14</sup> More importantly, and consistent with the relevance of EPC-  
124 driven neovascularization in tissue repair, impaired mobilization and recruitment of EPCs  
125 has been implicated in diabetic wounds.<sup>15-25</sup> Therefore, it is important to develop  
126 innovative strategies aimed at improving molecular signals that trigger EPC mobilization,  
127 homing, survival, and function as a means to ultimately achieve a meaningful clinical  
128 impact in the treatment of chronic wounds.<sup>26-30</sup>

129           One of the factors that mobilize EPCs from the bone marrow (BM) into circulation  
130 after injury is vascular endothelial growth factor (VEGF),<sup>31-33</sup> produced in injured tissues

131 in response to hypoxia.<sup>34</sup> VEGF is known to activate BM matrix metalloproteinase-9  
132 (MMP-9), which in turn releases stem cell factor (SCF) to facilitate EPC proliferation and  
133 mobilization from the BM niche into the peripheral circulation.<sup>35</sup> Furthermore, recent  
134 studies have shown that VEGF promotes stromal cell-derived factor 1 alpha (SDF-1 $\alpha$ )  
135 and CXC chemokine receptor 4 (CXCR4)-dependent signaling, leading to homing of bone  
136 marrow hematopoietic progenitor and stem cells and cardiac stem cells to tissue repair  
137 sites in models of myocardial infarction.<sup>36,37</sup> This signaling pathway is also known to be  
138 involved in EPC homing to sites of hypoxia/ischemia.<sup>38,39</sup> 40-42 Previous studies  
139 demonstrated that fibroblasts are likely a critical source of VEGF and SDF-1 $\alpha$  production  
140 in cutaneous wounds.<sup>43,44</sup> Existing evidence indicates that SDF-1 $\alpha$  is constitutively  
141 expressed by BM stromal cells and in so doing plays a key role in maintaining the BM  
142 niche, as well as providing directional cues that orchestrate CD34+ cell homing. Under  
143 homeostatic conditions, high SDF-1 $\alpha$  expression in the BM is considered a strong  
144 chemotactic factor whose function is to retain CD34+ progenitor cells within the BM niche.  
145 After an injury, SDF-1 $\alpha$  is released by the injured tissue,<sup>44,45</sup> and the higher local levels  
146 of SDF-1 $\alpha$  stimulates mobilization of progenitor cells out from the bone marrow and their  
147 recruitment to the injury site. Hattori et al. demonstrated that elevated SDF-1 $\alpha$  levels in  
148 peripheral blood resulted in the mobilization of these cells to the peripheral circulation.<sup>42</sup>  
149 In support of this finding, it has been shown that EPCs can be recruited from the bone  
150 marrow into peripheral hypoxic/ischemic tissue sites in response to treatment with SDF-  
151 1  $\alpha$  and/or VEGF.<sup>46</sup> However, the high concentrations and multiple doses needed for  
152 individual angiogenic growth factors to effect a relevant clinical outcome are problematic.  
153 In addition, the growth and chemotactic factors such as VEGF, granulocyte colony

154 stimulating factor (G-CSF), SCF, and SDF-1 $\alpha$  that have been used for EPC mobilization  
155 have also been shown to induce hematopoietic stem and progenitor cell, as well as  
156 monocyte and macrophage, mobilization; by increasing the inflammatory burden at the  
157 tissue repair site, this undue mobilization may have negative effects on wound repair and  
158 healing.<sup>47</sup> In other words, while it is plausible that angiogenic growth factor treatment  
159 improves progenitor cell homing and EPC-mediated vascular remodeling, it is equally  
160 conceivable that it may affect the survival and/or function of EPCs at the sites of tissue  
161 repair due to increased inflammation.

162 Notably, a recent study of a murine myocardial infarction model showed that IL-10,  
163 a potent anti-inflammatory cytokine,<sup>48,49</sup> facilitates EPC mobilization and  
164 revascularization.<sup>45</sup> Moreover, a study in which IL-10-transfected EPCs were adoptively  
165 transferred into the retinal microenvironment of diabetic rats showed improved vascular  
166 repair.<sup>50</sup> Although these collective findings support the role of IL-10 in EPC-mediated  
167 neovascularization, the mechanisms that determine such a function in cutaneous wounds  
168 remain to be elucidated. We and others have shown that, in non-diabetic wound healing,  
169 IL-10 overexpression in postnatal cutaneous dermal wounds induces regenerative  
170 (scarless) tissue repair via inflammatory regulation<sup>51-53</sup> and the fibroblast-mediated  
171 formation of a extracellular wound matrix rich in hyaluronan<sup>54</sup> through a STAT3-  
172 dependent signaling pathway.<sup>55,56</sup> The ability of IL-10 to drive EPC recruitment and  
173 neovascularization, along with its potential to promote dermal wound closure, have been  
174 largely unstudied.

175 We hypothesized that, upon injury to the skin, IL-10 stimulates the local expression  
176 of VEGF and SDF-1 $\alpha$  to mobilize and recruit EPCs into cutaneous wounds in a STAT3-



177 dependent manner, inducing neovascularization and promoting wound healing. To obtain  
178 experimental evidence that supports our hypothesis, we studied IL-10 overexpression in  
179 non-diabetic and diabetic murine models of dermal wound healing using a previously  
180 described lentivirus (LV) transduction approach.<sup>51,54</sup> To assess the proposed contribution  
181 of STAT3 signaling, we investigated IL-10 mediated tissue repair using a recently  
182 developed skin-specific STAT3 knockdown mouse model.<sup>54</sup>

183

## 184 **Materials and Methods**

185

### 186 **Generation of inducible STAT-3 knockout transgenic murine model**

187 All animal procedures were approved by Cincinnati Children's Hospital Medical  
188 Center and Baylor College of Medicine Institutional Animal Care and Use Committee. 8-  
189 12 week old wild type (WT) mice (C57BL/6J; hereafter referenced as WT), type II diabetic  
190 mice (BKS.Cg-m<sup>+/+</sup>Lepr<sup>db</sup>/J; hereafter referenced as db/db), MMP-9 knockout (KO) mice  
191 (FVB.Cg-Mmp9<sup>tm1Tv</sup>/J) and strain-matched WT mice (FVB/NJ) were purchased from  
192 Jackson laboratories (Bar Harbor, ME). Db/db mice with serum glucose >400 mg/dl and  
193 weight >40gms were used in all experiments. Conditional STAT3 KO mice were  
194 developed as explained previously.<sup>54</sup> Briefly, B6.Cg-Tg(UBC-cre/ERT2)<sup>1Ejb</sup>/J Cre-  
195 expressing mice driven by the human ubiquitin C (UBC) promoter were bred to mice  
196 containing a loxP-flanked STAT3<sup>flox/flox</sup> sequence (Jackson Laboratories). Double  
197 transgenic phenotype (STAT3<sup>Δ/Δ</sup>) was confirmed by genotyping<sup>54</sup> and 8-12 week old mice  
198 were used in all experiments. The dorsal skin was shaved and 4-OHT was topically  
199 administered (10 mg/ml in sterile vegetable oil, 150  $\mu$ l every day for seven days) to

200 activate Cre-mediated recombination and achieve STAT3 deletion (STAT3<sup>-/-</sup>) in the dorsal  
201 skin, with vegetable oil administration alone serving as vehicle control group (STAT3<sup>Δ/Δ</sup>  
202 <sup>ctrl</sup>). STAT3 knockdown in the skin was quantified using Western blotting and band  
203 densitometry on dorsal skin snips from treated area as described previously,<sup>54</sup> prior to  
204 using the mice in excisional wounding.

205

### 206 **Excisional wounding and tissue harvest**

207 Mice were anesthetized with isoflurane inhalation (0.5 ml, titrated). Dorsal skin was  
208 shaved and prepared by scrubbing alternately with isopropyl alcohol and povidone-iodine.  
209 Mice were divided into two treatment groups, where the left side dorsal flank was pre-  
210 treated with either 50μl of 1X10<sup>6</sup> TU/ml of lentiviral IL-10/GFP or lentiviral GFP alone,  
211 injected intradermally and labeled with India ink (n=4-6 mice/treatment group at each time  
212 point; both male and female). PBS labeled with India ink was injected in the bilateral flank  
213 as an internal control. A third group of mice, where both the bilateral flanks were pre-  
214 treated with intradermal injection of PBS labeled with India ink, served as the external  
215 control treatment group. After 4 days to allow transgene expression, mice were  
216 anesthetized and two full thickness excisional wounds extending to the panniculus  
217 carnosus were created on both flanks at the treatment sites using a 4mm biopsy punch  
218 (Miltex, Plainsboro, NJ). To prevent skin contraction, 6mm silicone stents were secured  
219 around the wounds with skin glue and 6-8 interrupted sutures with 6-0 nylon (Ethicon Inc.,  
220 Somerville, NJ). Stented wounds were covered with Tegaderm<sup>TM</sup> (3M, St. Paul, MN). In  
221 STAT3 mice cohorts, daily topical administration of 4-OHT or vegetable oil was continued.  
222 Specifically in MMP9<sup>-/-</sup> mice, in order to rescue the deficiency in release of SCF caused

223 by lack of MMP9 and to reinstate endothelial progenitor cell mobilization, 0.5 ug/kg of  
224 SCF (Peprotech, Rocky Hill, NJ) was injected daily post wounding via tail vein.<sup>47</sup>

225 At day three and day seven post-wounding, mice were euthanized and peripheral  
226 blood, wounded skin, and femur and iliac bones were collected. The bone marrow was  
227 flushed out with saline at stored at -80°C. Wounds were bisected, and one half was fixed  
228 in 10% formalin, and paraffin-embedded. The other half was processed for RNA and  
229 protein isolations.

230

### 231 **Histologic evaluation of wound morphology**

232 5 µm wound sections were cut from paraffin blocks. Epithelial gap closure and  
233 granulation tissue deposition were analyzed via Hematoxylin and Eosin (H&E) staining  
234 and morphometric image analysis using Nikon Elements (Nikon Instruments, Melville,  
235 NY). Wound ECM composition was determined using Movat's Pentachrome staining as  
236 per the manufacturer's protocol (Polyscientific, Bay Shore, NY).

237

### 238 **Immunohistochemical Staining**

239 5 µm serial sections were dewaxed in three changes of xylene for 10 minutes each  
240 and rehydrated in an ethanol to distilled water series. Antigen retrieval was performed  
241 using 1X Target Retrieval Solution (Dako, Carpinteria, CA) at 95°C for 20 minutes  
242 followed by a cool down to room temperature. Following a five minute wash in distilled  
243 water, sections were permeablized in 1X Phosphate Buffered Saline with 0.1 % Tween  
244 (PBSTw) for 10 minutes. Endogenous peroxidase was blocked with 3% H<sub>2</sub>O<sub>2</sub> followed  
245 by blocking of nonspecific protein binding with a solution of 5% Rabbit Serum + 1% Bovine

246 Serum Albumin in PBSTw for 2 hours at room temperature. A M.O.M kit (Vector  
247 Laboratories, Burlingame, CA) was applied to slides per manufacturer's instructions if  
248 mouse monoclonal primary antibodies were used. Immunostaining with antibodies  
249 against CD45 (1:2500, Abcam ab10558, Cambridge, MA), Lamp2a (1:50; Abcam  
250 ab18528), MECA-32 (1:10, deposited to the Developmental Studies Hybridoma Bank,  
251 University of Iowa by Butcher), STAT3 (1:500, Cell Signaling Technology 9139, Danvers,  
252 MA), Phospho-STAT3 (Tyr705) (1:200, Cell Signaling 9145), TGF- $\beta$ 1 (1:100, Abcam  
253 ab92486), and TGF- $\beta$ 3 (1:100, Abcam 15537) was performed for one hour at room  
254 temperature, followed by incubation with biotinylated species specific secondary  
255 antibodies (1:200, Vector Laboratories). ABC-DAB peroxidase based staining followed by  
256 hematoxylin counter staining (Vector Laboratories) was performed, and slides were  
257 dehydrated and mounted in xylene based permanent mounting media.

258 Endothelial progenitor cells (EPCs) were identified using double  
259 immunofluorescent staining for CD133 and Flk-1. 5  $\mu$ m paraffin sections were prepared  
260 similar to above and autofluorescence was blocked using 50mM Ammonium Chloride for  
261 20 minutes. Following a rinse in PBSTw, nonspecific protein binding was blocked with a  
262 solution of 5% Normal Goat Serum, 1% Bovine Serum Albumin in PBSTw for two hours  
263 at room temperature. Primary antibodies were labeled according to the Zenon Complex  
264 Formation protocol (Invitrogen, Carlsbad, CA). A 3:1 molar ratio of Fab to antibody target  
265 was used for CD133 (AbCam ab19898), and 6:1 molar ratio for FLK-1 (AbCam, ab2349).  
266 The CD133-488 complex was diluted 1:250 while the FLK-1-647 complex was diluted  
267 1:25 in block and incubated for one hour at room temperature. The sections were then  
268 washed three times in PBSTw for 5 minutes. Following the washes, the antibody-Fab

269 complex was fixed to the samples using 4% paraformaldehyde for 15 minutes. The  
270 samples were then washed three times in PBS, and mounted using Prolong Gold plus  
271 DAPI (Invitrogen).

272 The average number of CD45+, Lamp2a+ and CD133+Flk-1+ cells was quantified  
273 by counting positive cells in six high power fields (HPF, 40X) per wound section. Capillary  
274 lumen density was measured as the average number of MECA32-positive lumens from  
275 six HPF (40X) per section. HPF were equally distributed between the two wound edges.

276

### 277 **Flow cytometry**

278 350  $\mu$ l of whole blood per mouse was collected. Red blood cells were lysed using  
279 lysis solution per manufacturer's instructions (Qiagen, Alameda, CA). The cells were  
280 washed and centrifuged twice in 10ml of 1% BSA-PBS and re-suspended in 1ml of 1%  
281 BSA-PBS solution and counted. EPCs were co-labeled using APC-conjugated anti-CD34  
282 (1 $\mu$ l per  $5 \times 10^6$  cells), FITC-conjugated anti-CD133 (1.5 $\mu$ l per  $1 \times 10^6$  cells), and PE-  
283 conjugated anti-Flk-1 (2 $\mu$ l per  $1 \times 10^6$  cells) monoclonal antibodies (BD Biosciences, San  
284 Jose, CA) in the dark for 20 minutes at 4°C with gentle rocking. Unstained control and  
285 individual color controls were also included for gating. Cells were washed and re-  
286 suspended in 350 $\mu$ l of medium containing 7-AAD viability stain for live/dead discrimination  
287 (3 $\mu$ l per  $1 \times 10^6$  cells, eBioscience, San Diego, CA). Using the FACS Canto-II flow  
288 cytometer (BD Biosciences, San Jose, CA), single cells were gated to obtain a live CD34-  
289 positive population. Within this population, cells that co-expressed CD133 and Flk-1 were  
290 counted as EPCs. Each data point included at least 1000000 events. Flow data were then  
291 analyzed using FlowJo software (Tree Star Inc., Ashland, OR) by a blinded investigator.

292

### 293 **Primary Cell culture experiments**

294 Primary adult (8-10 week old) murine dermal fibroblasts were isolated from the  
295 skin of C57BL/6J mice (Jackson Laboratories, Bar Harbor, ME, USA) using standard  
296 isolation protocols.<sup>57</sup> The fibroblast culture was routinely maintained at 37°C under 5%  
297 CO<sub>2</sub> in a humidified chamber and cultured in Dulbecco's Modified Eagle's media (DMEM;  
298 GIBCO, Carlsbad, CA, USA) supplemented with 10% bovine growth serum (BGS;  
299 Hyclone, Logan, UT, USA), 100U penicillin, 100µg streptomycin + 0.25µg amphotericin B  
300 (PSF; Invitrogen, Carlsbad, CA, USA). All cells used were between passages 5-10.

301 Fibroblasts were seeded at  $2 \times 10^5$  cells/well in a six-well plate in DMEM containing  
302 10% BGS and allowed to settle overnight. Cells were then serum starved in DMEM culture  
303 media with 2% BGS and the conditioned culture was supplemented with 200ng/ml of  
304 murine IL-10 recombinant protein (Peprotech, Rocky Hill, NJ). After 48 hours, supernatant  
305 was collected to investigate the effect of IL-10 stimulation on VEGF and SDF-1α  
306 production by the fibroblasts. Cells from two different passages were tested in triplicate  
307 experiments.

308

### 309 **Aortic Ring Assay**

310 An aortic ring assay was performed as described previously.<sup>58</sup> Briefly, thoracic  
311 aortas were dissected from 8-10 week old male and female C57BL/6J mice after  
312 euthanasia. The periaortic connective tissue was carefully removed under a dissecting  
313 scope (M80 Stereomicroscope, Leica Microsystems, Buffalo Grove, IL) without damaging  
314 the vessel wall. The aorta was then cut into 0.5mm wide rings using a #10 blade and

315 affixed on a culture dish with a thin layer of growth factor-reduced basement membrane  
316 matrix Matrigel (Corning, NY) and covered with DMEM culture media. These rings were  
317 first serum-starved overnight in DMEM containing no serum to equilibrate their growth  
318 factor responses. Aortas were grown in (1) DMEM complete media similar to the primary  
319 culture described earlier, (2) DMEM complete media supplemented with 200ng/ml of  
320 murine IL-10 recombinant protein, (3) conditioned media from untreated adult dermal  
321 fibroblasts, or (4) conditioned media from adult dermal fibroblasts treated with 200ng/ml  
322 of murine IL-10 recombinant protein. Conditioned media for conditions 3 and 4 was from  
323 primary cell culture experiments used for detection of growth factor production as  
324 described above. Three rings per treatment were studied and the experiment was  
325 repeated two times with aortas from different mice and conditioned media from different  
326 primary cell isolations. The media was changed every 2-3 days. Sprout outgrowth was  
327 monitored on alternate days using phase contrast imaging (Leica DMI8). Image analysis  
328 software LASX (Leica) was used to measure the relative sprouting area (calculated as  
329 the difference in ring area between day 1 and 12).

330

### 331 **Quantitative Real-Time PCR**

332 Wound tissue was homogenized in RLT buffer and total RNA was isolated per  
333 manufacturer's recommendations (mini kit, Qiagen, Valencia, CA, USA). cDNA was  
334 synthesized from 1µg of RNA using the High Capacity cDNA Reverse Transcription kit  
335 (Applied Biosystems, Foster City, CA, USA) following manufacturer's protocols. SYBR  
336 green assays were designed to span intron/exon boundaries. Oligonucleotides were  
337 aligned against the mouse genome by Primer-BLAST ([www.NCBI.org](http://www.NCBI.org)) to ensure

338 specificity. Gene expression was assayed in triplicate using 1/40<sup>th</sup> of the cDNA template,  
339 and 300nM of forward and reverse primer in a 25µl Power SYBR Green PCR Master Mix  
340 reaction in the StepOne-Plus Real-Time PCR System (Applied Biosystems). Gene  
341 expression was normalized to mouse RPS29 gene expression. Relative expression  
342 values were calculated using the Comparative Ct ( $\Delta\Delta Ct$ ) method.<sup>59</sup> Oligonucleotide  
343 primer sequences used were as follows:

344 VEGFa 1F 5'-TTAAACGAACGTACTIONTGCAGATG-3' and 1R 5'-  
345 AGAGGTCTGGTTCCCGAA-3'

346 SDF-1 $\alpha$  1F 5'-GGTTCTTCGAGAGCCACATCG-3' and 1R 5'-  
347 ACGGATGTCAGCCTTCCTCG-3'

348 Rps29 1F 5'-TCTGAAGGCAAGATGGGTAC-3' and 1R 5'-  
349 GTGGCGGTTGGAGCAGACG-3'.

350

### 351 Enzyme Linked Immunosorbent Assays (ELISA)

352 Wound tissue was homogenized in 50mM Tris-HCl buffer containing 1% NP40,  
353 aprotinin (3.3µg/ml), leupeptin (10µg/ml) and pepstatin (4µg/ml) and stored at -80°C until  
354 testing (Sigma-Aldrich, St. Louis, MO). VEGF and SDF-1 $\alpha$  protein levels were determined  
355 using Quantikine ELISA Kits (R&D Systems, Minneapolis, MN) per manufacturer's  
356 instructions. ELISA data was normalized to total protein in each sample, calculated using  
357 the Coomassie Plus protein assay (Thermo Scientific, Logan, UT).

358

### 359 Statistical analyses



360 Data was analyzed using ANOVA followed by Tukey post-hoc means comparison  
361 test. The data are expressed as mean±standard deviation. Differences at  $p<0.05$  were  
362 considered to denote statistical significance.

363

## 364 **Results**

365

### 366 **IL-10 overexpression improved wound healing and reduced inflammatory cell** 367 **infiltration via a STAT3-dependent mechanism.**

368 We sought to determine the effect of IL-10 overexpression on the early wound  
369 healing responses, including wound closure, re-epithelialization, granulation tissue  
370 formation, and neovascularization, which have not been previously studied. To further  
371 determine whether these effects of IL-10 were mediated via conserved STAT3 signaling,  
372 we used a tamoxifen (4-OHT)-inducible cre driven skin-specific STAT3 knockout murine  
373 model. We generate the STAT3 $\Delta/\Delta$  transgenic mice as described previously<sup>54</sup>. Topical  
374 application of 4-OHT in vegetable oil as a vehicle down regulated STAT3 levels in the  
375 skin of these mice, compared to topical application of vegetable oil vehicle alone, which  
376 served as vehicle control for all experimental purposes (Figure S1).

377 Prior to assessing the effect of IL-10 overexpression on wound healing, we first  
378 compared baseline wound healing with PBS (moist wound) control treatment in the three  
379 groups of mice, i.e. C57BL/6J (WT), STAT3 $\Delta/\Delta$  Ctrl, and STAT3 $^{-/-}$ , and showed that at day  
380 three, epithelial gap closure and granulation tissue formation in STAT3 $\Delta/\Delta$  ctrl transgenic  
381 mice was comparable to WT mice. Further, these parameters were not affected in STAT3 $^{-/-}$   
382 mice wounds (Figure 1g, h; dotted line represents PBS wounds in WT). These data

383 confirm that the ~60% STAT3 knockdown we achieved at the protein levels in the skin of  
384 4-OHT-treated transgenic mice has no impact on the baseline ability of these mice to heal  
385 cutaneous wounds.

386 Next, we evaluated the effect of lentiviral-transduced IL-10 (LV IL-10)  
387 overexpression on wound healing at day 3 post wounding. Similar to our previous reports,  
388 where we demonstrated efficient transduction with transgenic protein expression  
389 detected at the base of wounds within 72 h of treatment, we saw a significant increase in  
390 IL-10 levels at day 3 post-wounding as well as enhanced phosphorylated-STAT3  
391 signaling in STAT3 $\Delta\Delta$  ctrl transgenic mice wounds treated with LV IL-10 (Figure S2).  
392 Histologic observation and morphometric analysis of day 3 wounds in STAT3 $\Delta\Delta$  ctrl mice  
393 demonstrated that IL-10 overexpression significantly enhanced the speed of epithelial  
394 gap closure and was associated with robust granulation tissue formation. LV GFP and  
395 PBS control wounds, in comparison, had a paucity in granulation tissue and reduced  
396 travel distance of the encroaching epithelial margins (Figure 1a-c; g-h, arrow heads  
397 indicate edge of the punch wound, arrows indicate the tip of the encroaching epithelial  
398 tongues). As expected, the effects of IL-10 were abrogated in STAT3 $^{-/-}$  mice (Fig. 1f),  
399 which had comparatively similar epithelial gap closure and granulation tissue formation  
400 to that observed in LV GFP or PBS wounds (Fig. 1d-h), providing support for the postulate  
401 that IL-10's effects are mediated via downstream STAT3 signaling.

402 At day 7 the extent of epithelial gap closure was similar between PBS-, LV GFP-,  
403 and LV IL-10-treated STAT3 $\Delta\Delta$  ctrl mice (Figure 2a-c). However, at the same time point,  
404 IL-10-treated wounds demonstrated more organized cell layers in the epidermis, and  
405 robust granulation tissue (Figure 2g), with uniform distribution of the cellular density

406 throughout the healing wound. Moreover, wounds treated with LV IL-10 had a greater  
407 degree of collagen deposition in the wound center (Figure S3). In contrast, LV GFP-  
408 (Figure 2b and e) and PBS-treated (Figure 2a and d) wounds demonstrated dense  
409 cellularity only at the encroaching edges, with lower cell density and collagen staining at  
410 the wound center, indicating a slower progress of wound healing. As anticipated, LV IL-  
411 10 treatment also significantly decreased the CD45+ (Figure 2h) and Lamp2a+ (Figure  
412 2i) inflammatory cell burden in the wound compared to LV GFP and PBS controls.  
413 Similarly, immunohistochemical evaluation of TGF- $\beta$ 1 and - $\beta$ 3 staining showed that LV  
414 IL-10-treated wounds had comparable TGF- $\beta$ 1 wound bed expression patterns to those  
415 of control wounds (Figure 2j), but higher TGF- $\beta$ 3 wound bed expression (Figure 2k).  
416 Conversely, the previously-seen effect of IL-10 on granulation tissue formation (Figure  
417 2d-g), inflammatory cell infiltration (Figure 2h-i) and TGF- $\beta$ 3 expression (Figure 2k) was  
418 largely abrogated in STAT3<sup>-/-</sup> mice and resulted in a wound healing response similar to  
419 LV GFP and PBS control wounds. Taken together, these data support our prediction that  
420 IL-10 overexpression improves initial wound closure and granulation tissue deposition by  
421 mechanisms that are STAT3 dependent, ultimately leading to superior remodeling and  
422 regeneration phenotype that we have recently reported.<sup>54</sup>

423

424 **IL-10 overexpression increased capillary density and EPC infiltration of the wound**  
425 **tissue via STAT3.**

426 We then investigated the effect of IL-10 overexpression on wound capillary density  
427 and EPC infiltration. To that end, we performed immunohistochemical staining with  
428 MECA-32, a panendothelial cell antigen: LV IL-10-treated wounds in STAT3 <sup>$\Delta/\Delta$  ctrl</sup> mice

429 developed vessels with well-defined lumens at day 7, in contrast to control LV GFP- or  
430 PBS-treated wounds, which showed mostly non-cohesive individual cell staining (Figure  
431 3a-c). LV IL-10-treated wounds also showed significantly increased capillary lumen  
432 density per high power field (LV IL-10:  $24.17 \pm 2.69$  vessels/HPF vs. LV GFP:  $15.7 \pm 2.49$ ,  
433 PBS:  $14.6 \pm 3.8$ ,  $p < 0.001$ ; Figure 3m). In contrast, STAT3<sup>-/-</sup> wounds treated with LV IL-10  
434 failed to achieve the anticipated effects on capillary lumen density (STAT3<sup>-/-</sup> + LV IL-10:  
435  $12.18 \pm 4.18$  vessels/HPF vs. STAT3 <sup>$\Delta/\Delta$</sup>  ctrl + LV IL-10:  $24.17 \pm 2.69$ ,  $p < 0.001$ ; Figure 3d-f,  
436 m).

437 Similarly, LV IL-10-treated wounds in STAT3 <sup>$\Delta/\Delta$</sup>  ctrl mice had significantly increased  
438 infiltration of CD133<sup>+</sup>/Flk-1<sup>+</sup> EPCs, as shown by immunofluorescence co-labeling at day  
439 7 after wounding (LV IL-10:  $5.17 \pm 1.03$  EPCs/HPF vs. LV GFP:  $2.43 \pm 0.97$ , PBS:  
440  $3.13 \pm 1.42$ ,  $p < 0.01$ ; Figure 3g-i, n). In contrast, LV IL-10 once again failed to achieve the  
441 anticipated increase in wound EPC expression when administered to STAT3<sup>-/-</sup> mice,  
442 wherein the EPC count was no different than that quantified in LV GFP- or PBS-treated  
443 control wounds (STAT3<sup>-/-</sup> + LV IL-10:  $3.38 \pm 1.63$  EPCs/HPF vs. STAT3 <sup>$\Delta/\Delta$</sup>  ctrl + LV IL-10:  
444  $5.17 \pm 1.03$ ,  $p < 0.01$ ; Figure 3j-l, n). These data further support the significant role of IL-10  
445 in driving both neovascularization and EPC recruitment to wounds as part of its function  
446 in regulating cutaneous wound healing, as well as underscoring the dependence of this  
447 process on STAT3 signaling.

448

449 **IL-10 overexpression increased EPC mobilization in response to wounding via a**  
450 **STAT3-dependent mechanism.**

451 We then determined whether the increase in EPC counts in LV IL-10-treated  
452 wounds was facilitated by an increase in EPC mobilization. As we have previously shown  
453 that that in response to cutaneous wounding, EPC levels peak in peripheral blood at day  
454 3 post-injury<sup>60</sup>, we evaluated the peripheral blood for the presence of CD34<sup>+</sup>CD133<sup>+</sup>Flk-  
455 1<sup>+</sup> co-labelled cells in STAT3<sup>Δ/Δ</sup> <sup>ctrl</sup> and STAT3<sup>-/-</sup> mice after treatment of their cutaneous  
456 wound with LV IL-10, LV GFP and PBS using flow cytometry (Figure 4a-c).

457 Similar to our previous study<sup>60</sup>, our data shows that in comparison to unwounded  
458 mice, skin wounding and moist treatment with PBS alone resulted in a significant ( $p < 0.01$ )  
459 increase in circulating levels of EPCs at day 3 post-wounding in STAT3<sup>Δ/Δ</sup> <sup>ctrl</sup> mice (Figure  
460 4b-d:  $3.54 \pm 0.85$  vs.  $7.96 \pm 1.68$ ;  $p < 0.01$ ). However, LV IL-10 overexpression in STAT3<sup>Δ/Δ</sup>  
461 <sup>ctrl</sup> mice significantly increased the percentage of circulating EPC levels at day 3 post-  
462 wounding over that of mice treated with LV GFP or PBS controls (LV IL-10:  $24.58 \pm 6.35$   
463 vs. LV GFP:  $9.28 \pm 3.0$ , PBS:  $7.96 \pm 1.68$ ,  $p < 0.01$ ; Figure 4d). Consistent with the other  
464 observations, LV-mediated IL-10 overexpression in STAT3<sup>-/-</sup> mice wounds did not  
465 experience this increase in circulating EPCs; EPC levels in these mice were analogous  
466 to LV GFP or PBS controls (STAT3<sup>-/-</sup> + LV IL-10:  $7.22 \pm 2.51$  vs. STAT3<sup>Δ/Δ</sup> <sup>ctrl</sup> + LV IL-10:  
467  $24.58 \pm 6.35$ ,  $p < 0.01$ ; Figure 4d). These data show that IL-10 increased injury-induced  
468 mobilization of EPCs beyond physiologic levels, and further uphold that the function of IL-  
469 10 overexpression in the cutaneous wound healing is STAT3-dependent.

470

#### 471 **IL-10 increased VEGF expression via a STAT3-dependent mechanism.**

472 To investigate if IL-10-STAT3 signaling influences the expression of VEGF, a  
473 known promoter of EPC mobilization, we measured the levels of the growth factor under

474 experimental conditions similar to those preceding. We specifically analyzed VEGF  
475 expression in the wound specimen, serum, and bone marrow (BM) as these tissue  
476 compartments represent the major microenvironments where VEGF-mediated signaling  
477 is known to facilitate injury-induced EPC mobilization. We found that, in comparison to  
478 unwounded mice, skin wounding and treatment with PBS moist treatment control  
479 significantly increased VEGF levels in all three of these compartments, most strongly in  
480 the wound itself as compared to expression levels in uninjured skin (Figure 5a-c). LV IL-  
481 10 treatment of wounds in STAT3 $\Delta\Delta$  ctrl mice resulted in a further increase in VEGF levels  
482 in these three sites; while this increase trended but did not reach significance in wounded  
483 skin (Figure 5a; p=0.64), it was significant in serum (Figure 5b; p<0.01) and BM (Figure  
484 5c; p<0.05). Once again, LV-mediated overexpression of IL-10 in STAT3 $^{-/-}$  mice did not  
485 result in increased VEGF expression.

486 We sought to briefly explain how LV IL-10-induced VEGF overexpression in our  
487 model might be a major contributor to increase in EPC mobilization, using a well-defined  
488 mouse model of MMP9 deficiency known to have impaired EPC mobilization after  
489 cutaneous wounding.<sup>47</sup> As VEGF-induced activation of MMP9 is essential for the release  
490 of SCF and thereby EPC mobilization from the BM niche into peripheral circulation,<sup>35</sup> an  
491 absence of functional MMP9 in this mouse model results in impaired EPC mobilization  
492 after cutaneous wounding. To investigate the role of VEGF/MMP9-mediated signaling in  
493 IL-10-dependent EPC mobilization, we created wounds in MMP9 $^{-/-}$  mice under similar  
494 experimental conditions as above. Consistent with previously reported findings, wounded  
495 MMP9 $^{-/-}$  mice had no change in levels of circulating EPCs at day 3 post-injury, proof of an  
496 impaired wound healing phenotype as compared to WT. As expected and as shown

497 previously by our group, administration of SCF to MMP9<sup>-/-</sup> wounded mice reinstated EPC  
498 numbers in circulation. However, when LV IL-10 was overexpressed in MMP9<sup>-/-</sup> mice  
499 wounds, VEGF levels increased in the serum, but did not restore EPC mobilization  
500 (Figure S4). These data suggest that, while LV IL-10 overexpression in the wound has a  
501 systemic effect on VEGF, intact MMP9 function is likely also essential to the downstream  
502 signaling for EPC mobilization.

503

504 **IL-10 treatment resulted in a positive SDF-1 $\alpha$  concentration gradient via a STAT3-**  
505 **dependent mechanism.**

506 To investigate whether the effect of IL-10 on increasing circulating EPC levels and  
507 EPC presence in dermal wounds is mediated by SDF-1 $\alpha$ , we assessed levels of this  
508 chemotactic factor in wounds, serum, and BM at day 3 post-wounding. There was an  
509 increase in SDF-1 $\alpha$  expression in wounded skin specimen (Figure 5d;  $p < 0.05$ ) at day 3  
510 post-injury when compared to expression levels in uninjured skin. No change in serum  
511 levels of SDF-1 $\alpha$  was seen (Figure 5e), but a significant decrease in BM SDF-1 $\alpha$  levels  
512 (Figure 5f;  $p < 0.01$ ) was noted in response to cutaneous wounding. These findings support  
513 the role of SDF-1 $\alpha$  in the retention of EPCs in a quiescent niche under homeostatic  
514 conditions, and suggest that a positive SDF-1 $\alpha$  gradient is established following  
515 wounding, which may facilitate the egress of EPCs from the bone marrow to the  
516 circulation and homing to the site of the wound. We also observed that LV IL-10  
517 overexpression in the wounds of STAT3 <sup>$\Delta/\Delta$  ctrl</sup> mice at day 3 post-wounding resulted in  
518 significant increases in SDF-1 $\alpha$  levels in wounded tissue (Figure 5d;  $p < 0.05$ ) and in the  
519 serum (Figure 5e;  $p < 0.001$ ) without affecting BM SDF-1 $\alpha$  levels, as compared to LV GFP

520 and PBS treatments (Figure 5f). LV IL-10's effect in increasing SDF-1 $\alpha$  levels in skin  
521 wounds and serum, however, was consistently abrogated in STAT3<sup>-/-</sup> mice. Collectively,  
522 these data indicate that IL-10 overexpression in skin wounds establishes a STAT3-  
523 dependent SDF-1 $\alpha$  chemotactic gradient towards the periphery, promoting EPC  
524 mobilization from the BM niche and homing to the wound site with higher local SDF-1 $\alpha$   
525 levels.

526

### 527 **IL-10 induced VEGF and SDF-1 $\alpha$ production by fibroblasts.**

528 Because fibroblasts are important effector cells in wound healing and  
529 neovascularization, we investigated whether fibroblasts could be the source of IL-10-  
530 induced VEGF and SDF-1 $\alpha$  expression. Consistent with this, we found that treatment with  
531 IL-10 significantly increased VEGF production in primary murine dermal fibroblasts *in vitro*  
532 (Figure 6a;  $p < 0.05$ ). Furthermore, the same *in vitro* treatment of primary murine dermal  
533 fibroblasts with IL-10 also resulted in significantly increased SDF-1 $\alpha$  levels (Figure 6b;  
534  $p < 0.05$ ). Together, these data provide evidence of the ability of fibroblasts to upregulate  
535 VEGF and SDF-1 $\alpha$  levels in response to IL-10, and possibly of a central cellular role in  
536 the wound healing process observed in our *in vivo* studies.

537

### 538 **Relative sprouting area and lumen density on aortic ring assay is increased in IL- 539 10-treated fibroblast-conditioned media.**

540 The aortic ring assay is a simple but informative assay to identify modulators of  
541 angiogenesis by recapitulating the essential steps of microvessel outgrowth *in vitro*,  
542 including proliferation, migration, tubule formation, and recruitment of supporting cells.



543 We performed this assay by comparing aortic rings cultured in DMEM complete media  
544 spiked with IL-10 versus DMEM complete media alone to determine the effect of IL-10 on  
545 capillary outgrowth. As anticipated from previous studies, aortic rings exposed to DMEM  
546 showed a robust endothelial cell (EC) outgrowth with a characteristic cobble stone-like  
547 appearance and a relative sprouting area (RSA) of  $15.9 \pm 11.6$  mm at 12 days in culture  
548 (Figure 6c). Rings exposed to IL-10-spiked DMEM, however, had a larger RSA  
549 ( $24.9 \pm 12.3$  mm) and also showed ECs organized into 2D networks (Figure 6d;  
550 arrowheads). We then repeated the aortic ring assays with conditioned DMEM  
551 supernatant from *in vitro* cultures of untreated adult dermal fibroblasts (AFB) versus  
552 conditioned supernatant from adult dermal fibroblasts treated with IL-10. When  
553 conditioned supernatant from untreated AFB was transferred, the aortic rings showed no  
554 measurable endothelial sprouting at day 12 (Figure 6e), suggesting that factors produced  
555 by normal fibroblasts under normal cell culture conditions perhaps support vessel  
556 stabilization, as opposed to sprouting. Aortic rings exposed to conditioned supernatant  
557 from AFB cultured in DMEM+IL-10 produced sprouting with an RSA of  $14.4 \text{ mm} \pm 0.68 \text{ mm}$ ,  
558 but interestingly, this treatment resulted in a dense capillary-like network formation  
559 (Figure 6f, arrowheads). Collectively, these data underscore the role of IL-10 in  
560 stimulating angiogenesis-inducing factors by dermal fibroblasts and suggest that  
561 fibroblasts are a potential target cell for IL-10's pro-angiogenic effects.

562

### 563 **IL-10 enhanced wound healing and neovascularization in db/db murine wounds.**

564 Our data from WT mice support our working postulate that overexpression of LV  
565 IL-10 upregulates VEGF and SDF-1 $\alpha$ , thereby promoting EPC-mediated

566 neovascularization and wound healing. To assess the impact of this signaling under  
567 adverse wound healing conditions, we studied the effect of LV IL-10 overexpression in a  
568 db/db murine wound model of type II diabetes.

569 We pretreated dorsal skin in db/db mice with LV IL-10, wounding the skin after 4  
570 days to allow transgenic protein overexpression, and then harvested these wounds at day  
571 7 post-injury. Our results show that LV IL-10 overexpression significantly improved wound  
572 closure in db/db wounds as compared to LV GFP or PBS treated controls (Figure 7a-d).  
573 Strikingly, while the granulation tissue area was bland and comprised predominantly of  
574 adipose tissue in the LV GFP and PBS controls, LV IL-10-treated wounds had a robust  
575 granulation tissue deposition (Figure 7e), similar in morphology to WT mice wounds. We  
576 then analyzed wound neovascularization with MECA-32 staining and found a significant  
577 increase in capillary density in LV IL-10-treated db/db wounds as compared to LV GFP  
578 or PBS controls (Figure 7f-i). Furthermore, a significant increase in the CD133+Flk1+  
579 EPC levels in the wound beds was also observed in LV IL-10-treated db/db wounds as  
580 compared to LV GFP or PBS controls (Figure 7j-m), with a concomitant increase in VEGF  
581 and SDF-1 $\alpha$  gene expression in the wounds (Figure 7n-o). Taken together, our data  
582 support the significance of IL-10 overexpression in improving standard wound healing  
583 parameters and in increasing the recruitment, survival, and retention of EPCs to promote  
584 neovascularization and tissue repair, even under pathological conditions in which wound  
585 healing is impaired, such as in diabetes.

586

587 **Discussion**

588           In the present study, we report that IL-10 overexpression can play a pivotal role in  
589 postnatal cutaneous wound neovascularization and healing in both normal and diabetic  
590 wounds. Our data underscore a novel biological function for IL-10 in enhancing wound  
591 neovascularization by promoting EPC mobilization and recruitment, which in addition to  
592 its accepted role in immune regulation, contributes a crucial new angle to a previously  
593 reported view of regenerative cutaneous tissue repair. Moreover, our data support the  
594 capacity of IL-10 to induce EPC recruitment via VEGF and SDF-1 $\alpha$  signaling. Therefore,  
595 we propose a model wherein IL-10 overexpression in cutaneous wounds increases the  
596 expression of VEGF and SDF-1 $\alpha$  by fibroblasts at sites of dermal injury, resulting in a  
597 positive VEGF and SDF-1 $\alpha$  gradient that favors mobilization of EPCs from the bone  
598 marrow, which can then home to injured tissues to support wound healing and  
599 neovascularization (Figure 8). These collective findings are also consistent with our  
600 original working hypothesis that the intracellular IL-10 signaling cascade leading to  
601 enhanced wound neovascularization and healing is STAT3-dependent<sup>55</sup>, as IL-10's  
602 effects on wound neovascularization, angiogenic growth factor expression and EPC  
603 levels were lost in our murine model of skin-specific STAT3 knockdown.

604           Importantly, our present study was also able to show the potential of IL-10  
605 overexpression in significantly improving wound healing outcomes in diabetic mice, which  
606 included improved neovascularization and EPC recruitment and retention to the site of  
607 injury. In previous studies, the presence of unresolved inflammation in chronic wound  
608 environments has been suggested as impairing EPC function and increasing EPC  
609 apoptosis and elimination in the wound bed,<sup>61</sup> a phenomenon that may partly explain why  
610 current strategies aimed at pharmacologically enhancing EPC mobilization from the BM,

611 as well as *ex vivo* transplantation of expanded autologous EPCs<sup>62,63</sup> have not attained  
612 optimal efficacy in clinical trials. In this context, IL-10 may present a more effective  
613 strategy to enhance EPC recruitment and neovascularization in impaired wound healing  
614 states such as in diabetic wounds, as it has the additional benefit of regulating wound  
615 inflammation. This strategy has been reported by Krishnamurthy *et al.*, who demonstrated  
616 in a murine myocardial infarction (MI) model that treatment with IL-10 enhanced  
617 transplanted EPC association with vascular structures and their overall survival, resulting  
618 in improved neovascularization of the injured myocardium and left ventricular function. In  
619 this study, IL-10 treatment resulted in increased STAT3 signaling and increased VEGF  
620 and SDF-1 $\alpha$  expression in the myocardium after MI, providing mechanistic insights into  
621 IL-10's effects on EPCs, which appear to be mediated through SDF-1 $\alpha$ /CXCR4 and  
622 STAT3/VEGF signaling mechanisms in their model. The authors suggested that, by  
623 protecting the EPCs in an adverse microenvironment characterized by prolonged  
624 inflammation and hypoxia, IL-10 might increase the retention and numbers of these cells  
625 to participate in tissue repair,<sup>45</sup> and similar mechanisms could explain the therapeutic  
626 benefit of IL-10 in promoting diabetic wound healing noted in our studies.

627 The present studies provide compelling evidence that treatment with IL-10  
628 overexpression promotes VEGF expression in cutaneous wounds and establishes a  
629 positive SDF-1 $\alpha$  concentration gradient that favors EPC mobilization from the bone  
630 marrow and homing to the site of injury, which could account for higher numbers of EPCs  
631 both in the peripheral blood and in wound microenvironment compared to baseline. Our  
632 *in vitro* data support dermal fibroblasts as one of the potential sources of IL-10-induced  
633 VEGF and SDF-1 $\alpha$  in response to injury, something also supported by previous murine

634 wound healing studies.<sup>44</sup> However, further research is needed to fully understand the  
635 mechanism behind the IL-10-associated increases in VEGF expression observed in the  
636 serum and BM compartments. These include an assessment of the stage of molecular  
637 events, which could either place VEGF signaling upstream of SDF-1 $\alpha$  or implicate  
638 alternative mechanisms connecting peripheral tissue injury with IL-10, VEGF, and SDF-  
639 1 $\alpha$  expression in the BM. In line with this rationale, our studies also propose MMP9 as an  
640 intermediary in the IL-10-induced EPC mobilization cascade, but once again, focused  
641 future studies will be required to fully assess the contribution of MMP9 to the IL-10–  
642 VEGF–SDF-1 $\alpha$  and EPC axis. Evidence of a direct link between BM-derived MMP9 and  
643 VEGF-induced angiogenesis, including BM cell mobilization and BM-derived cell  
644 recruitment to angiogenic foci in the brain has been demonstrated,<sup>64</sup> but whether IL-10 is  
645 influential in facilitating this angiogenic response in cutaneous wounding is yet to be  
646 determined. Nevertheless, the reciprocal relationship between IL-10, MMP-9, and VEGF  
647 warrants further investigation in light of the findings in this study. These studies could  
648 provide relevant information that could eventually lead to the design of innovative targeted  
649 therapies to optimize EPC mobilization, wound neovascularization, and regenerative  
650 wound healing. Cell types other than fibroblasts could also be involved in the effects  
651 reported here, and future efforts will be directed towards adapting our skin-specific STAT3  
652 knockout model system to develop keratinocyte, fibroblast, or endothelial cell specific  
653 STAT3-deficient mice. The findings from these models can then be compared to the skin-  
654 specific knockdown to better understand the contribution by the individual skin  
655 compartments.

656 A role for IL-10 in dermal wound repair has been established in the literature. Sato  
657 et al demonstrated that IL-10 expression peaked about 3 hours after wounding and once  
658 again at 3 days after injury, with keratinocytes and mononuclear cells being the major  
659 sources of IL-10<sup>65</sup>. Skin wound healing in a fetal skin transplant model from *IL-10*<sup>-/-</sup> mice  
660 suggested that IL-10 is essential for fetal scarless tissue repair<sup>66</sup>. These studies suggest  
661 an important role for endogenous IL-10 in regulating inflammatory cell infiltration and  
662 cytokine production in cutaneous wound healing. Given the notion that while IL-10  
663 expression rapidly increases in adult wounds at 3 hours post wounding, and yet postnatal  
664 cutaneous wounds heal with scar formation as compared to their mid-gestation fetal  
665 counterpart, it is plausible that relevant physiological levels cannot be upheld under adult  
666 dermal conditions. Indeed, IL-10 is an immunoregulatory cytokine that limits both innate  
667 as well as adaptive immune responses of the host-immune interactions, mainly aimed to  
668 protect the host from immune-mediated tissue damage. IL-10 is known to inhibit  
669 overexpression of broad spectrum of pro-inflammatory cytokines and chemokines such  
670 as IL-1, IL-6, IL-8, TNF- $\alpha$ , monocyte chemoattractant protein MCP-1, macrophage  
671 inflammatory protein (MIP)-1 in wound healing<sup>65,66</sup>. We and others have shown that IL-10  
672 overexpression regulates inflammatory responses to promote a regenerative wound  
673 healing phenotype in murine cutaneous wounds in a dose-dependent manner.<sup>51-53</sup>  
674 Furthermore, we have recently reported a novel role for IL-10 in inducing a fibroblast-  
675 mediated formation of an extracellular wound matrix rich in hyaluronan<sup>54</sup>, which proved  
676 to be essential for IL-10's regenerative wound healing capability. Several other studies  
677 have also shown that IL-10 regulates the synthesis and degradation of various  
678 extracellular matrix molecules in different fibroblastic cell types, which upholds the notion

679 of potential IL-10 anti-fibrotic mechanisms in the skin<sup>67-69</sup>. Yet, its impact on the process  
680 of cutaneous wound neovascularization in physiologic and pathophysiologic disease  
681 states such as diabetes has not been completely deciphered. A study by Eming *et al.*<sup>70</sup>  
682 reported that in comparison to WT controls, cutaneous wounds of IL-10<sup>-/-</sup> mice show an  
683 accelerated angiogenic response during the early phase (day 3) of wound healing, along  
684 with an increase in VEGF-A. However, by day 5, the angiogenic rush and VEGF-A  
685 upregulation subside with no difference in vessel density in healed wounds. In this study,  
686 macrophages comprise the majority of VEGF-A-expressing cells in IL-10<sup>-/-</sup> wounds, and  
687 though overall healing was rapid, these wounds were characterized by poor strength,  
688 increased macrophage infiltration, increased angiogenic burst, increase in  $\alpha$ -sma smooth  
689 muscle cell (SMA) positive myofibroblast-mediated wound contraction, and increased  
690 wound collagen/scar tissue. These observations may arguably be interpreted as  
691 compensatory mechanisms initiated by the lack of anti-inflammatory IL-10 in these  
692 knockout mice. Similar findings of an increase in angiogenic burst along with robust  
693 inflammation and rapid closure of wounds were reported in mutant mice deficient in the  
694 expression of other chemokines, such as IL-12/23<sup>71</sup>. Furthermore, IL-10-deficient EPCs  
695 had impaired migratory function *in vitro* in response to SDF-1 $\alpha$ . Such impairments in local  
696 SDF-1 $\alpha$  expression levels and EPC function have also been noted in diabetic wound  
697 healing.<sup>44</sup> Further inquiry must be undertaken to elucidate whether IL10 directly alters  
698 the biology of EPCs leading to their greater survival and function with roles in physiologic  
699 and constitutively inflamed diseased states.

700 In summary, our data provide evidence that supports the role for IL-10 in  
701 enhancing VEGF and SDF-1 $\alpha$  levels, neovascularization, EPC recruitment, and ultimately

702 improving cutaneous wound healing outcomes via STAT3 signaling. The  
703 immunoregulatory and anti-inflammatory effects of IL-10 may also serve to enhance EPC  
704 mobilization, survival, and function in the wounds. These data additionally point out to the  
705 need to design precision strategies to deliver targeted and sustained levels of IL-10 with  
706 the therapeutic potential to enhance EPC-driven angiogenesis and wound healing in  
707 normal and diabetic wounds.

708

### 709 **Conflict of Interest**

710 The authors on the manuscript do not have any conflict of interest (either  
711 financial or personal).

712

### 713 **Author contributions**

714 S.B., E.S., T.M.C., P.B.L., and S.G.K. designed the experiments; S.B., E.S., X.W.,  
715 H.V.V., N.T, A.B., C.M.M., performed bench and animal related experimental work; S.B.,  
716 E.S., X.W., H.V.V., N.T, A.B., C.M.M., D.A.N., M.J.B., T.M.C., P.B.L., and S.G.K.  
717 analyzed data; S.B., E.S., X.W., H.V.V., N.T, A.B., C.M.M., D.A.N., T.M.C., M.J.B.,  
718 P.B.L., and S.G.K. contributed to the discussions, manuscript writing and editing. We  
719 affirm that all authors have read and agree with the manuscript.

720

### 721 **Acknowledgements and Funding Sources**

722 The authors sincerely acknowledge the technical support received from our  
723 laboratory staff members and the support received from Cincinnati Children's Hospital



724 Medical Center Flow Cytometry Core. The authors also acknowledge the editorial support  
725 of Drs. Monica Fahrenholtz and Hector Martinez-Valdez from the Office of Surgical  
726 Research Administration (OSRA), Department of Surgery, Texas Children's Hospital.  
727 This study is supported by 1R01GM111808-01 NIH/NIGMS (SGK) and Wound Healing  
728 Society Foundation 3M Award (SB, SGK).  
729

730 **References**

731

- 732 **1.** Economic Costs of Diabetes in the U.S. in 2017. *Diabetes care*. May  
733 2018;41(5):917-928.
- 734 **2.** Frykberg RG, Banks J. Challenges in the Treatment of Chronic Wounds. *Advances*  
735 *in wound care*. Sep 1 2015;4(9):560-582.
- 736 **3.** Casqueiro J, Alves C. Infections in patients with diabetes mellitus: A review of  
737 pathogenesis. *Indian journal of endocrinology and metabolism*. Mar 2012;16 Suppl  
738 1:S27-36.
- 739 **4.** Balaji S, King A, Crombleholme TM, Keswani SG. The Role of Endothelial  
740 Progenitor Cells in Postnatal Vasculogenesis: Implications for Therapeutic  
741 Neovascularization and Wound Healing. *Advances in wound care*. Jul  
742 2013;2(6):283-295.
- 743 **5.** Ribatti D, Vacca A, Nico B, Roncali L, Dammacco F. Postnatal vasculogenesis.  
744 *Mechanisms of development*. Feb 2001;100(2):157-163.
- 745 **6.** Asahara T, Masuda H, Takahashi T, et al. Bone marrow origin of endothelial  
746 progenitor cells responsible for postnatal vasculogenesis in physiological and  
747 pathological neovascularization. *Circulation research*. Aug 6 1999;85(3):221-228.
- 748 **7.** Urbich C, Dimmeler S. Endothelial progenitor cells: characterization and role in  
749 vascular biology. *Circulation research*. Aug 20 2004;95(4):343-353.
- 750 **8.** Tepper OM, Capla JM, Galiano RD, et al. Adult vasculogenesis occurs through in  
751 situ recruitment, proliferation, and tubulization of circulating bone marrow-derived  
752 cells. *Blood*. Feb 1 2005;105(3):1068-1077.
- 753 **9.** Carmeliet P. Developmental biology. One cell, two fates. *Nature*. Nov 2  
754 2000;408(6808):43, 45.
- 755 **10.** Ehrbar M, Metters A, Zammaretti P, Hubbell JA, Zisch AH. Endothelial cell  
756 proliferation and progenitor maturation by fibrin-bound VEGF variants with  
757 differential susceptibilities to local cellular activity. *Journal of controlled release :*  
758 *official journal of the Controlled Release Society*. Jan 3 2005;101(1-3):93-109.
- 759 **11.** Urbich C, Aicher A, Heeschen C, et al. Soluble factors released by endothelial  
760 progenitor cells promote migration of endothelial cells and cardiac resident  
761 progenitor cells. *Journal of molecular and cellular cardiology*. Nov 2005;39(5):733-  
762 742.
- 763 **12.** Patel J, Seppanen EJ, Rodero MP, et al. Functional Definition of Progenitors  
764 Versus Mature Endothelial Cells Reveals Key SoxF-Dependent Differentiation  
765 Process. *Circulation*. Feb 21 2017;135(8):786-805.
- 766 **13.** Asahara T, Murohara T, Sullivan A, et al. Isolation of putative progenitor  
767 endothelial cells for angiogenesis. *Science*. Feb 14 1997;275(5302):964-967.

- 768 **14.** Peichev M, Naiyer AJ, Pereira D, et al. Expression of VEGFR-2 and AC133 by  
769 circulating human CD34(+) cells identifies a population of functional endothelial  
770 precursors. *Blood*. Feb 1 2000;95(3):952-958.
- 771 **15.** Falanga V. Wound healing and its impairment in the diabetic foot. *Lancet*. Nov 12  
772 2005;366(9498):1736-1743.
- 773 **16.** Blakytyn R, Jude E. The molecular biology of chronic wounds and delayed healing  
774 in diabetes. *Diabet Med*. Jun 2006;23(6):594-608.
- 775 **17.** Phillips TJ. Chronic cutaneous ulcers: etiology and epidemiology. *The Journal of*  
776 *investigative dermatology*. Jun 1994;102(6):38S-41S.
- 777 **18.** Kim KA, Shin YJ, Kim JH, et al. Dysfunction of endothelial progenitor cells under  
778 diabetic conditions and its underlying mechanisms. *Archives of pharmacal*  
779 *research*. Feb 2012;35(2):223-234.
- 780 **19.** Capla JM, Grogan RH, Callaghan MJ, et al. Diabetes impairs endothelial  
781 progenitor cell-mediated blood vessel formation in response to hypoxia. *Plastic*  
782 *and reconstructive surgery*. Jan 2007;119(1):59-70.
- 783 **20.** Madonna R, De Caterina R. Cellular and molecular mechanisms of vascular injury  
784 in diabetes--part II: cellular mechanisms and therapeutic targets. *Vascular*  
785 *pharmacology*. Mar-Jun 2011;54(3-6):75-79.
- 786 **21.** Callaghan MJ, Ceradini DJ, Gurtner GC. Hyperglycemia-induced reactive oxygen  
787 species and impaired endothelial progenitor cell function. *Antioxidants & redox*  
788 *signaling*. Nov-Dec 2005;7(11-12):1476-1482.
- 789 **22.** Fadini GP, Miorin M, Facco M, et al. Circulating endothelial progenitor cells are  
790 reduced in peripheral vascular complications of type 2 diabetes mellitus. *Journal*  
791 *of the American College of Cardiology*. May 3 2005;45(9):1449-1457.
- 792 **23.** Keswani SG, Katz AB, Lim FY, et al. Adenoviral mediated gene transfer of PDGF-  
793 B enhances wound healing in type I and type II diabetic wounds. *Wound Repair*  
794 *Regen*. Sep-Oct 2004;12(5):497-504.
- 795 **24.** Tepper OM, Galiano RD, Capla JM, et al. Human endothelial progenitor cells from  
796 type II diabetics exhibit impaired proliferation, adhesion, and incorporation into  
797 vascular structures. *Circulation*. Nov 26 2002;106(22):2781-2786.
- 798 **25.** Vasa M, Fichtlscherer S, Aicher A, et al. Number and migratory activity of  
799 circulating endothelial progenitor cells inversely correlate with risk factors for  
800 coronary artery disease. *Circulation research*. Jul 6 2001;89(1):E1-7.
- 801 **26.** Kalka C, Masuda H, Takahashi T, et al. Transplantation of ex vivo expanded  
802 endothelial progenitor cells for therapeutic neovascularization. *Proceedings of the*  
803 *National Academy of Sciences of the United States of America*. Mar 28  
804 2000;97(7):3422-3427.
- 805 **27.** Suh W, Kim KL, Kim JM, et al. Transplantation of endothelial progenitor cells  
806 accelerates dermal wound healing with increased recruitment of  
807 monocytes/macrophages and neovascularization. *Stem Cells*. Nov-Dec  
808 2005;23(10):1571-1578.

- 809 **28.** Balaji S, Vaikunth SS, Lang SA, et al. Tissue-engineered provisional matrix as a  
810 novel approach to enhance diabetic wound healing. *Wound repair and*  
811 *regeneration : official publication of the Wound Healing Society [and] the European*  
812 *Tissue Repair Society.* Jan-Feb 2012;20(1):15-27.
- 813 **29.** Cho H, Balaji S, Sheikh AQ, et al. Regulation of endothelial cell activation and  
814 angiogenesis by injectable peptide nanofibers. *Acta biomaterialia.* Jan  
815 2012;8(1):154-164.
- 816 **30.** Georgescu A, Alexandru N, Constantinescu A, Titorencu I, Popov D. The promise  
817 of EPC-based therapies on vascular dysfunction in diabetes. *European journal of*  
818 *pharmacology.* Nov 1 2011;669(1-3):1-6.
- 819 **31.** Li B, Sharpe EE, Maupin AB, et al. VEGF and PlGF promote adult vasculogenesis  
820 by enhancing EPC recruitment and vessel formation at the site of tumor  
821 neovascularization. *FASEB journal : official publication of the Federation of*  
822 *American Societies for Experimental Biology.* Jul 2006;20(9):1495-1497.
- 823 **32.** Asahara T, Takahashi T, Masuda H, et al. VEGF contributes to postnatal  
824 neovascularization by mobilizing bone marrow-derived endothelial progenitor  
825 cells. *The EMBO journal.* Jul 15 1999;18(14):3964-3972.
- 826 **33.** Rosti V, Massa M, Campanelli R, De Amici M, Piccolo G, Perfetti V. Vascular  
827 endothelial growth factor promoted endothelial progenitor cell mobilization into the  
828 peripheral blood of a patient with POEMS syndrome. *Haematologica.* Sep  
829 2007;92(9):1291-1292.
- 830 **34.** Heeschen C, Dimmeler S, Hamm CW, Boersma E, Zeiher AM, Simoons ML.  
831 Prognostic significance of angiogenic growth factor serum levels in patients with  
832 acute coronary syndromes. *Circulation.* Feb 4 2003;107(4):524-530.
- 833 **35.** Heissig B, Hattori K, Dias S, et al. Recruitment of stem and progenitor cells from  
834 the bone marrow niche requires MMP-9 mediated release of kit-ligand. *Cell.* May  
835 31 2002;109(5):625-637.
- 836 **36.** Tang JM, Wang JN, Zhang L, et al. VEGF/SDF-1 promotes cardiac stem cell  
837 mobilization and myocardial repair in the infarcted heart. *Cardiovascular research.*  
838 Aug 1 2011;91(3):402-411.
- 839 **37.** Sengupta N, Afzal A, Caballero S, et al. Paracrine modulation of CXCR4 by IGF-1  
840 and VEGF: implications for choroidal neovascularization. *Investigative*  
841 *ophthalmology & visual science.* May 2010;51(5):2697-2704.
- 842 **38.** Peled A, Petit I, Kollet O, et al. Dependence of human stem cell engraftment and  
843 repopulation of NOD/SCID mice on CXCR4. *Science.* Feb 5 1999;283(5403):845-  
844 848.
- 845 **39.** Rey M, Valenzuela-Fernandez A, Urzainqui A, et al. Myosin IIA is involved in the  
846 endocytosis of CXCR4 induced by SDF-1alpha. *Journal of cell science.* Mar 15  
847 2007;120(Pt 6):1126-1133.

- 848 **40.** Liu ZJ, Tian R, An W, et al. Identification of E-selectin as a novel target for the  
849 regulation of postnatal neovascularization: implications for diabetic wound healing.  
850 *Annals of surgery*. Oct 2010;252(4):625-634.
- 851 **41.** Moore MA, Hattori K, Heissig B, et al. Mobilization of endothelial and hematopoietic  
852 stem and progenitor cells by adenovector-mediated elevation of serum levels of  
853 SDF-1, VEGF, and angiopoietin-1. *Annals of the New York Academy of Sciences*.  
854 Jun 2001;938:36-45; discussion 45-37.
- 855 **42.** Hattori K, Heissig B, Tashiro K, et al. Plasma elevation of stromal cell-derived  
856 factor-1 induces mobilization of mature and immature hematopoietic progenitor  
857 and stem cells. *Blood*. Jun 1 2001;97(11):3354-3360.
- 858 **43.** Bauer SM, Bauer RJ, Liu ZJ, Chen H, Goldstein L, Velazquez OC. Vascular  
859 endothelial growth factor-C promotes vasculogenesis, angiogenesis, and collagen  
860 constriction in three-dimensional collagen gels. *Journal of vascular surgery*. Apr  
861 2005;41(4):699-707.
- 862 **44.** Gallagher KA, Liu ZJ, Xiao M, et al. Diabetic impairments in NO-mediated  
863 endothelial progenitor cell mobilization and homing are reversed by hyperoxia and  
864 SDF-1 alpha. *The Journal of clinical investigation*. May 2007;117(5):1249-1259.
- 865 **45.** Krishnamurthy P, Thal M, Verma S, et al. Interleukin-10 deficiency impairs bone  
866 marrow-derived endothelial progenitor cell survival and function in ischemic  
867 myocardium. *Circulation research*. Nov 11 2011;109(11):1280-1289.
- 868 **46.** Losordo DW, Dimmeler S. Therapeutic angiogenesis and vasculogenesis for  
869 ischemic disease. Part I: angiogenic cytokines. *Circulation*. Jun 1  
870 2004;109(21):2487-2491.
- 871 **47.** Cho H, Balaji S, Hone NL, et al. Diabetic wound healing in a MMP9-/- mouse  
872 model. *Wound Repair Regen*. Sep 2016;24(5):829-840.
- 873 **48.** Couper KN, Blount DG, Riley EM. IL-10: the master regulator of immunity to  
874 infection. *J Immunol*. May 1 2008;180(9):5771-5777.
- 875 **49.** Ouyang W, Rutz S, Crellin NK, Valdez PA, Hymowitz SG. Regulation and functions  
876 of the IL-10 family of cytokines in inflammation and disease. *Annual review of*  
877 *immunology*. 2011;29:71-109.
- 878 **50.** Wang Y, Fan L, Meng X, et al. Transplantation of IL-10-transfected endothelial  
879 progenitor cells improves retinal vascular repair via suppressing inflammation in  
880 diabetic rats. *Graefe's archive for clinical and experimental ophthalmology =*  
881 *Albrecht von Graefes Archiv fur klinische und experimentelle Ophthalmologie*. Oct  
882 2016;254(10):1957-1965.
- 883 **51.** Peranteau WH, Zhang L, Muvarak N, et al. IL-10 overexpression decreases  
884 inflammatory mediators and promotes regenerative healing in an adult model of  
885 scar formation. *The Journal of investigative dermatology*. Jul 2008;128(7):1852-  
886 1860.
- 887 **52.** Gordon A, Kozin ED, Keswani SG, et al. Permissive environment in postnatal  
888 wounds induced by adenoviral-mediated overexpression of the anti-inflammatory

- 889 cytokine interleukin-10 prevents scar formation. *Wound Repair Regen.* Jan-Feb  
890 2008;16(1):70-79.
- 891 **53.** Kieran I, Knock A, Bush J, et al. Interleukin-10 reduces scar formation in both  
892 animal and human cutaneous wounds: results of two preclinical and phase II  
893 randomized control studies. *Wound Repair Regen.* May-Jun 2013;21(3):428-436.
- 894 **54.** Balaji S, Wang X, King A, et al. Interleukin-10-mediated regenerative postnatal  
895 tissue repair is dependent on regulation of hyaluronan metabolism via fibroblast-  
896 specific STAT3 signaling. *FASEB journal : official publication of the Federation of*  
897 *American Societies for Experimental Biology.* Mar 2017;31(3):868-881.
- 898 **55.** Moore KW, de Waal Malefyt R, Coffman RL, O'Garra A. Interleukin-10 and the  
899 interleukin-10 receptor. *Annual review of immunology.* 2001;19:683-765.
- 900 **56.** Levy DE, Lee CK. What does Stat3 do? *The Journal of clinical investigation.* May  
901 2002;109(9):1143-1148.
- 902 **57.** Hiramatsu K, Sasagawa S, Outani H, Nakagawa K, Yoshikawa H, Tsumaki N.  
903 Generation of hyaline cartilaginous tissue from mouse adult dermal fibroblast  
904 culture by defined factors. *The Journal of clinical investigation.* Feb  
905 2011;121(2):640-657.
- 906 **58.** Baker M, Robinson SD, Lechertier T, et al. Use of the mouse aortic ring assay to  
907 study angiogenesis. *Nature protocols.* Dec 22 2011;7(1):89-104.
- 908 **59.** Pfaffl MW. A new mathematical model for relative quantification in real-time RT-  
909 PCR. *Nucleic Acids Res.* May 1 2001;29(9):e45.
- 910 **60.** Morris LM, Klanke CA, Lang SA, et al. Characterization of endothelial progenitor  
911 cells mobilization following cutaneous wounding. *Wound Repair Regen.* Jul-Aug  
912 2010;18(4):383-390.
- 913 **61.** Desouza CV, Hamel FG, Bidasee K, O'Connell K. Role of inflammation and insulin  
914 resistance in endothelial progenitor cell dysfunction. *Diabetes.* Apr  
915 2011;60(4):1286-1294.
- 916 **62.** Ingram DA, Caplice NM, Yoder MC. Unresolved questions, changing definitions,  
917 and novel paradigms for defining endothelial progenitor cells. *Blood.* Sep 1  
918 2005;106(5):1525-1531.
- 919 **63.** Fadini GP, Losordo D, Dimmeler S. Critical reevaluation of endothelial progenitor  
920 cell phenotypes for therapeutic and diagnostic use. *Circulation research.* Feb 17  
921 2012;110(4):624-637.
- 922 **64.** Hao Q, Su H, Palmer D, et al. Bone marrow-derived cells contribute to vascular  
923 endothelial growth factor-induced angiogenesis in the adult mouse brain by  
924 supplying matrix metalloproteinase-9. *Stroke.* Feb 2011;42(2):453-458.
- 925 **65.** Sato Y, Ohshima T, Kondo T. Regulatory role of endogenous interleukin-10 in  
926 cutaneous inflammatory response of murine wound healing. *Biochemical and*  
927 *biophysical research communications.* Nov 1999;265(1):194-199.



- 928 **66.** Liechty KW, Kim HB, Adzick NS, Crombleholme TM. Fetal wound repair results in  
929 scar formation in interleukin-10-deficient mice in a syngeneic murine model of  
930 scarless fetal wound repair. *Journal of pediatric surgery*. Jun 2000;35(6):866-872;  
931 discussion 872-863.
- 932 **67.** Yamamoto T, Eckes B, Krieg T. Effect of interleukin-10 on the gene expression of  
933 type I collagen, fibronectin, and decorin in human skin fibroblasts: differential  
934 regulation by transforming growth factor-beta and monocyte chemoattractant  
935 protein-1. *Biochemical and biophysical research communications*. Feb 16  
936 2001;281(1):200-205.
- 937 **68.** Moroguchi A, Ishimura K, Okano K, Wakabayashi H, Maeba T, Maeta H.  
938 Interleukin-10 suppresses proliferation and remodeling of extracellular matrix of  
939 cultured human skin fibroblasts. *European surgical research. Europaische  
940 chirurgische Forschung. Recherches chirurgicales europeennes*. Jan-Feb  
941 2004;36(1):39-44.
- 942 **69.** Shi JH, Guan H, Shi S, et al. Protection against TGF-beta1-induced fibrosis effects  
943 of IL-10 on dermal fibroblasts and its potential therapeutics for the reduction of skin  
944 scarring. *Archives of dermatological research*. May 2013;305(4):341-352.
- 945 **70.** Eming SA, Werner S, Bugnon P, et al. Accelerated wound closure in mice deficient  
946 for interleukin-10. *The American journal of pathology*. Jan 2007;170(1):188-202.
- 947 **71.** Matias MA, Saunus JM, Ivanovski S, Walsh LJ, Farah CS. Accelerated wound  
948 healing phenotype in Interleukin 12/23 deficient mice. *J Inflamm (Lond)*. Dec 20  
949 2011;8:39.
- 950

951 **Figure Legends**

952

953 **Figure 1: IL-10 overexpression enhanced wound closure in a STAT3 dependent**  
954 **manner *in vivo*.** (a-f) Hematoxylin and Eosin staining of wounds at day 3 post wounding.  
955 Wounds are marked in India ink; wound margins are indicated by arrowheads and the  
956 encroaching epithelial margins are indicated by arrows. (a-f) Original magnification: 4X,  
957 Scale Bar=500µm; As compared to PBS (a) or lentiviral GFP (b) control treatments,  
958 lentiviral IL-10-treated wounds show enhanced wound closure and robust granulation  
959 tissue formation (c) in STAT3<sup>Δ/Δ</sup> ctrl vehicle control mice. IL-10's effects on wound healing  
960 were abrogated in STAT3<sup>-/-</sup> mice, as evidenced by significantly impaired wound  
961 morphology (d-f). (g-h) Quantitation of epithelial gap (g) and granulation tissue (h)  
962 amongst the different treatments based on image analysis show that while there is no  
963 significant difference in gap closure between PBS and lentiviral GFP wounds, lentiviral  
964 IL-10 treated wounds exhibit increased gap closure and granulation tissue formation,  
965 whereas in STAT3<sup>-/-</sup> mice this effect is abrogated. Bar plots: mean ± SD, 2 sections/  
966 wound, n=4 wounds from different mice/ treatment group, \*\*\* p<0.001 by ANOVA.

967

968 **Figure 2: IL-10 overexpression reduced inflammation and enhanced wound**  
969 **remodeling and regenerative phenotype in a STAT3 dependent manner.** (a-f)  
970 Hematoxylin and Eosin staining of wounds at day 7 post wounding. Wounds are marked  
971 in India ink; wound margins are indicated by arrowheads. (a-f) Original magnification: 4X,  
972 Scale Bar=500µm; (a-c) similar gap closure is observed between the three groups – PBS,  
973 lentiviral GFP and lentiviral IL-10 treated wounds in STAT3<sup>Δ/Δ</sup> ctrl mice. However, IL-10



974 treated cohort display thicker epidermis and robust granulation tissue as compared to the  
975 control treatments.(d-f) All treatment cohorts healed similarly in STAT3<sup>-/-</sup> mice and the  
976 effect of IL-10 on the epidermis and granulation tissue deposition is not apparent. (f)  
977 quantitation of granulation tissue between different treatment groups in STAT3<sup>Δ/Δ</sup> ctrl show  
978 a modest trend in IL-10 treated mice, however, with no statistical significance between  
979 STAT3<sup>Δ/Δ</sup> ctrl and STAT3<sup>-/-</sup> with different treatments. (h) quantification of staining with  
980 CD45 show significantly lower CD45+ cells per high power field (HPF; 40X) in lentiviral  
981 IL-10 wounds as compared to lentiviral GFP or PBS treatments in STAT3<sup>Δ/Δ</sup> ctrl mice,  
982 which is abrogated in STAT3<sup>-/-</sup> mice. (i) Elevated expression of Lamp2a positive cells was  
983 observed in IL-10 treated wounds as compared to the control treatments in STAT3<sup>Δ/Δ</sup> ctrl  
984 mice, which is abrogated in STAT3<sup>-/-</sup> mice. (j) Panels left to right show similar TGF-β1  
985 staining pattern in controls vs IL-10 treated wounds in STAT3<sup>Δ/Δ</sup> ctrl, mice, that remain  
986 similar in expression in STAT3<sup>-/-</sup> wounds. (k) A definite increase in TGF-β3 expression is  
987 seen in IL-10 treated wounds as compared to control treated ones in STAT3<sup>Δ/Δ</sup> ctrl mice,  
988 however, this effect induced by IL-10 waned in STAT3<sup>-/-</sup> wounds. Scale bar=50μm in (j-  
989 k); Bar plots: mean ± SD, 2 sections/ wound, n=4 wounds from different mice/ treatment  
990 group, \*\*\* p<0.001 by ANOVA.

991

992 **Figure 3: IL-10 overexpression enhanced wound neovascularization and EPC**  
993 **infiltration in a STAT3 dependent manner.** (a-f) Capillary lumens are marked by MECA-  
994 32 staining. (g-l) EPCs are identified by their characteristic morphology, large eccentric  
995 nuclei and CD133+/FLK-1+ staining (CD133–green, FLK-1–red, merged–yellow).  
996 Representative MECA-32+ and CD133+/Flk-1+ wound images for each treatment group

997 at day 7 are shown here. Lentiviral IL-10 treatment significantly enhanced wound vessel  
998 density (m) and EPC numbers (n) per high power field (HPF), compared to lentiviral GFP  
999 or PBS treatments in STAT3 $\Delta/\Delta$  ctrl mice , which was abrogated in STAT3 $^{-/-}$  mice.  
1000 CD133+/FLK-1+ EPCs are indicated by arrow heads. Bar plots: mean $\pm$ SD. 2  
1001 sections/wound, n=3-4 wounds from different mice/ treatment group, \*\*\* p<0.001 by  
1002 ANOVA. Scale Bars=50 $\mu$ m and Original magnification: 40X in (a-f); Scale Bars=20 $\mu$ m  
1003 and Original magnification: 80X in (g-l).

1004

1005 **Figure 4: IL-10 overexpression enhanced STAT3 dependent EPC mobilization after**  
1006 **cutaneous wounding.** Peripheral blood was collected at baseline before wounding and  
1007 again at day 3 post wounding from STAT3 $\Delta/\Delta$  ctrl and STAT3 $^{-/-}$  mice that received lentiviral  
1008 IL-10, lentiviral GFP or PBS treatments. Cells were stained with 7AAD, CD34, CD133 and  
1009 Flk-1 for flow cytometry analysis. (a) Single cells were gated for 7AAD $^{-}$  CD34 $^{+}$   
1010 populations; of which cells that were CD133 $^{+}$ Flk-1 $^{+}$  were quantified as EPCs (b). There is  
1011 a clear difference in EPC levels in peripheral blood at baseline in uninjured mice (b) vs.  
1012 mice at day three post wounding (c). (d) Quantitative analysis show that following  
1013 cutaneous wounding there is a significant increase in EPCs at day 3 post wounding as  
1014 compared to uninjured control mice. Lentiviral IL-10 treatment significantly increase  
1015 circulating EPC levels as compared to lentiviral GFP or PBS treatments in STAT3 $\Delta/\Delta$  ctrl  
1016 mice.IL-10's effects were abrogated in STAT3 $^{-/-}$  mice. Bar plots= mean $\pm$ SD of EPC  
1017 numbers as analyzed by flow jo software, n=3-4 wounds from different mice/ treatment  
1018 group, \*\*p<0.01 by ANOVA.

1019

1020 **Figure 5: IL-10 regulates VEGF and SDF-1 $\alpha$  gradients in wounds, serum and bone**  
1021 **marrow in a STAT3-dependent manner.** Wound tissue, peripheral blood and bone  
1022 marrow (BM) were collected at baseline before wounding and again at day 3 post  
1023 wounding from STAT3 $\Delta\Delta^{ctrl}$  and STAT3 $^{-/-}$  mice that received lentiviral IL-10, lentiviral GFP  
1024 or PBS treatments. VEGF and SDF-1 $\alpha$  levels were quantified with ELISA. The effect of  
1025 different treatments on VEGF and SDF-1 $\alpha$  levels within the wound tissue specimens,  
1026 serum and BM are respectively shown in (a-c) and (d-f). Bar plots= mean $\pm$ SD, n=3-4  
1027 wounds from different animals/ treatment group, \*p<0.05, \*\*p<0.01, \*\*\*p<0.001 by  
1028 ANOVA.

1029

1030 **Figure 6: IL10 induced VEGF and SDF-1 $\alpha$  production in primary murine dermal**  
1031 **fibroblasts and increased cell sprouting and capillary-like network formation in**  
1032 **aortic ring assay.** Primary murine dermal fibroblasts in culture were incubated +/-  
1033 200ng/ml of IL-10 for 48 hrs. Supernatants from the cultures were assayed for VEGF and  
1034 SDF-1 $\alpha$  expression by ELISA. (a) VEGF levels significantly increase in IL 10 treated  
1035 fibroblasts as compared to untreated cells. (b) SDF-1 $\alpha$  levels significantly increase in IL-  
1036 10 treated fibroblasts as compared to controls. (c-d) Murine thoracic aortas are treated  
1037 with either DMEM or DMEM supplemented with 200ng/ml IL-10 for 12 days. Aortic rings  
1038 show an endothelial cell outgrowth when treated with DMEM (c), and the ones spiked  
1039 with DMEM + IL10 respond similarly but with an greater relative sprouting area (d). (e-f)  
1040 The aortic ring assay was repeated with either conditioned media from primary murine  
1041 dermal fibroblasts, or conditioned media from fibroblasts treated with IL-10 from panel  
1042 (a). The former produced no measurable endothelial outgrowth (e), whereas with the

1043 latter, a significant outgrowth with an increase in capillary-like 2D network formation was  
1044 observed. White arrowheads indicate the capillary-like networks. Bar plots: mean $\pm$ SD,  
1045 experiments are conducted in triplicates with cells from 2 passages; \* $p$ <0.05, by ANOVA.  
1046  $n$ =3 aortic rings per treatment were studied and the experiment was repeated two times  
1047 with aortas from different mice and conditioned media from different primary cell  
1048 isolations.

1049

1050 **Figure 7: IL 10 enhanced wound healing and neovascularization in diabetic murine**  
1051 **wound model.** Dorsal wounds in db/db mice treated with either PBS, lentiviral GFP or  
1052 lentiviral IL-10 were harvested at 7 days post injury. (a-c) Hematoxylin and Eosin staining  
1053 reveals that lentiviral IL-10 treated wounds close faster as compared to the two control  
1054 groups. Quantitation of epithelial gap (d) and granulation tissue is shown (e). (f-h)  
1055 Representative images of MECA-32 stained wounds section across the three treatment  
1056 conditions - PBS, lentiviral GFP or lentiviral IL-10 respectively. Increased MECA-32  
1057 stained-capillary lumens are seen in lentiviral IL-10 wounds, which is quantitatively  
1058 significant (i). (j-m) Increase in the CD133+Flk1+ EPC levels in the wound beds is also  
1059 observed in lentiviral IL-10-treated db/db wounds as compared to the control treatments.  
1060 (n-o) qRT-PCR on wound tissue homogenates collected at day 7 shows that VEGF (n)  
1061 and (o) SDF-1 $\alpha$  expression is significantly higher IL-10 treated cohort as compared to the  
1062 PBS and lentiviral GFP controls. Scale bar=500 $\mu$ m in (a-c), 50 $\mu$ m in (f-h) and 20 $\mu$ m in (j-  
1063 l); Bar plots: mean  $\pm$  SD, 2 sections/ wound,  $n$ =4 wounds from different mice/ treatment  
1064 group, \*  $p$ <0.05 by ANOVA.

1065

1066 **Figure 8: IL-10 can play a pivotal role in postnatal cutaneous wound healing and**  
1067 **neovascularization by influencing EPC mobilization and recruitment via STAT3**  
1068 **dependent increase in VEGF and SDF-1 $\alpha$ .** IL10 overexpression, via a STAT3  
1069 dependent mechanism, results in enhanced levels of VEGF and SDF-1 $\alpha$ , wound healing  
1070 and neovascularization associated with an increase in EPCs in the wound. We put forth  
1071 a potential pathway that IL-10 overexpression may induce wound fibroblasts to produce  
1072 more VEGF and SDF-1 $\alpha$ , which creates a positive gradient for bone marrow derived EPC  
1073 mobilization and homing to healing tissue.

1074

## Figures

Figure 1

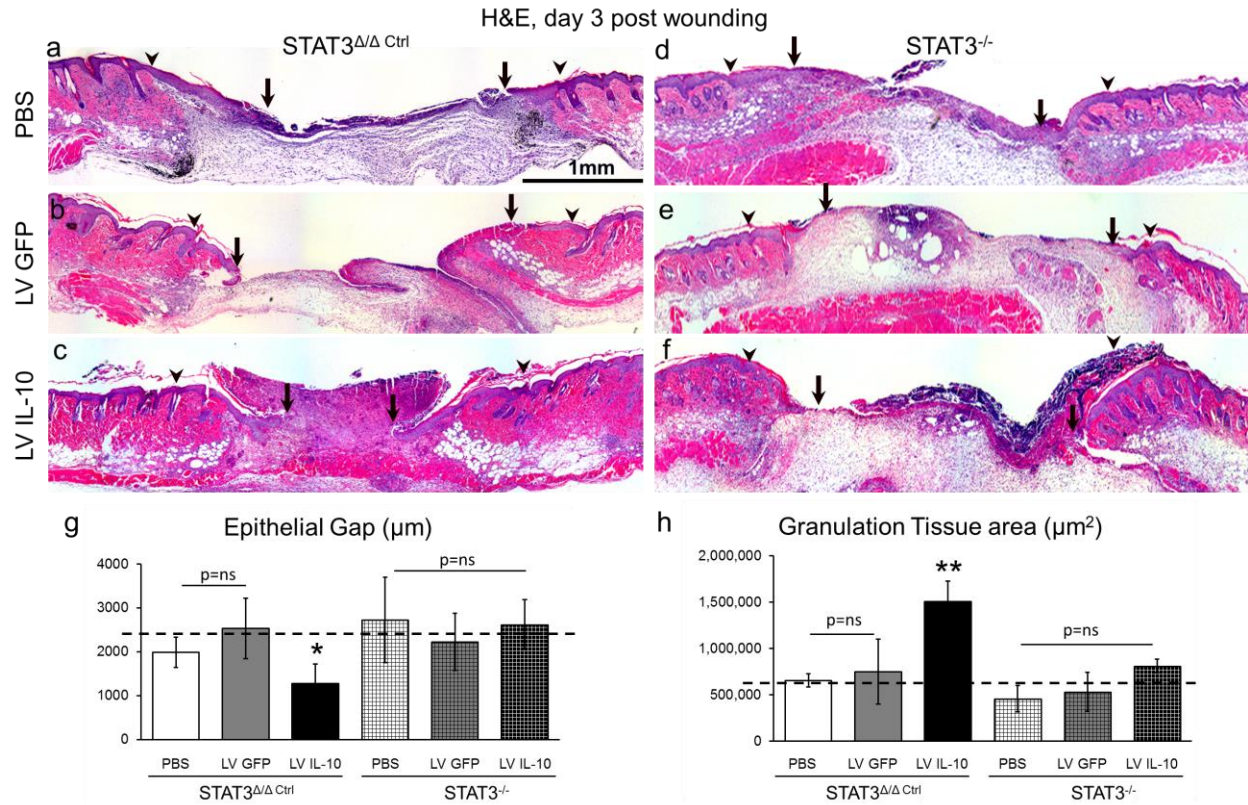



**Figure 2**

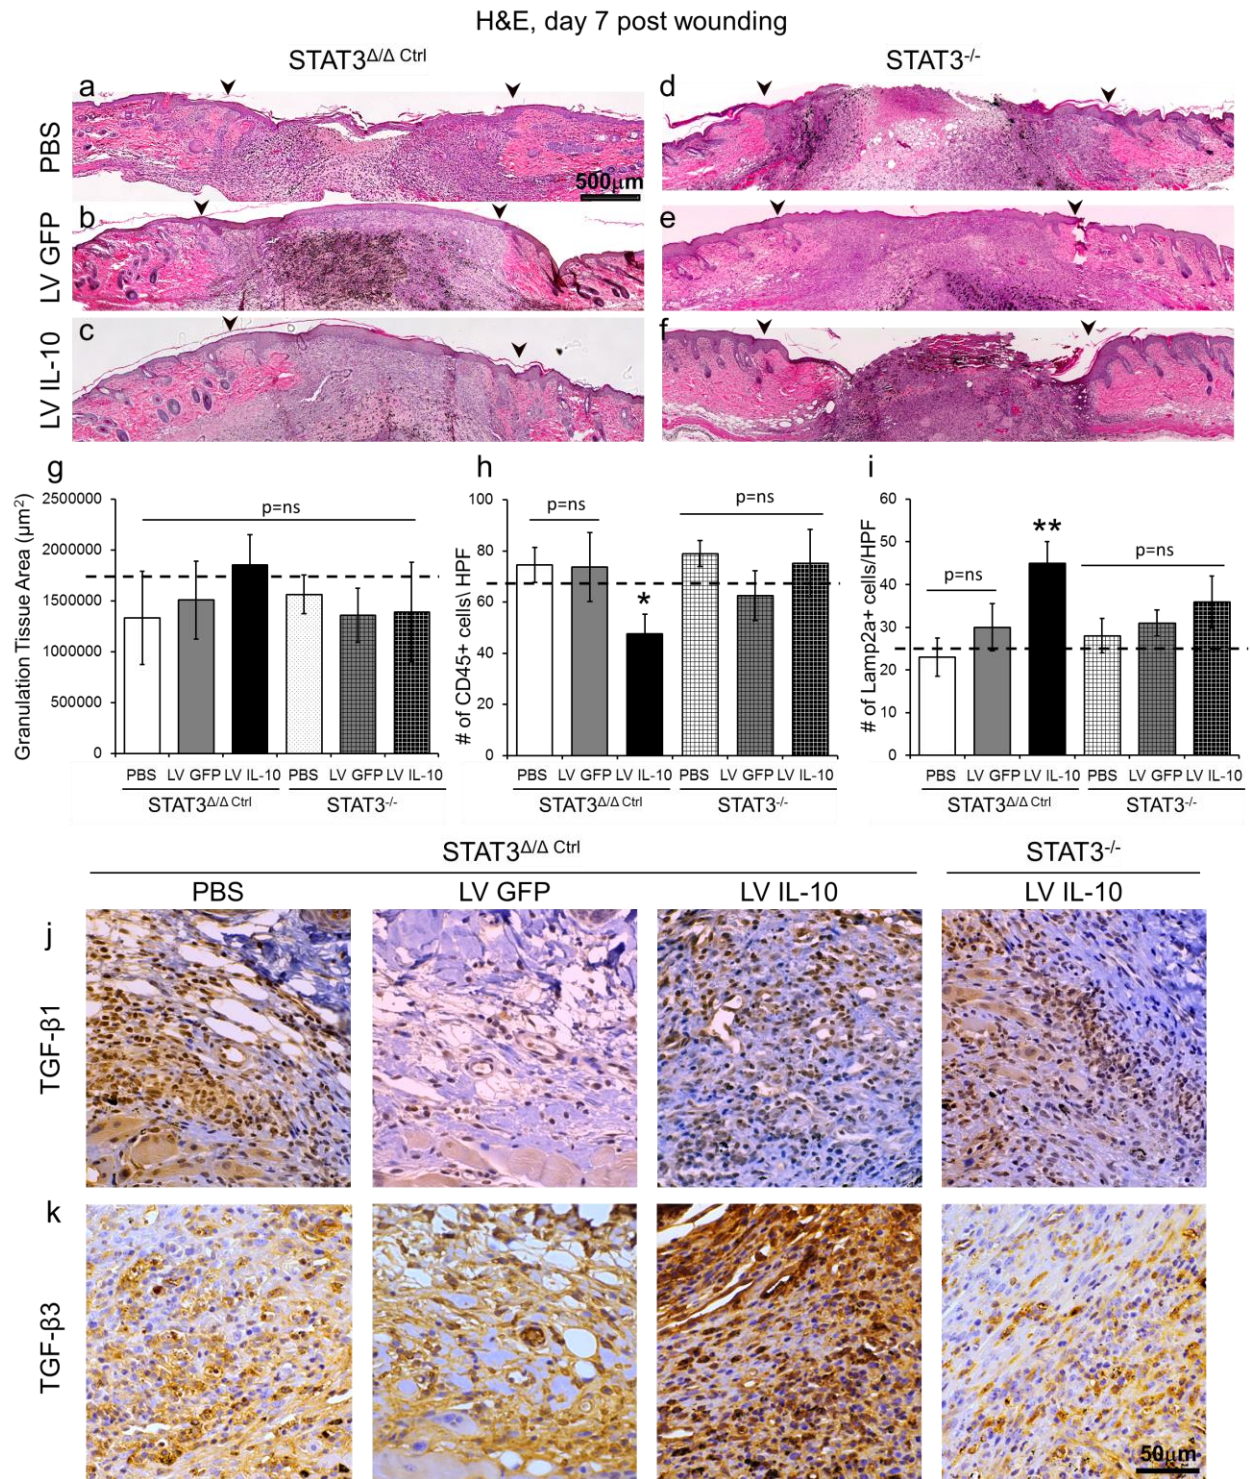

**Figure 3**

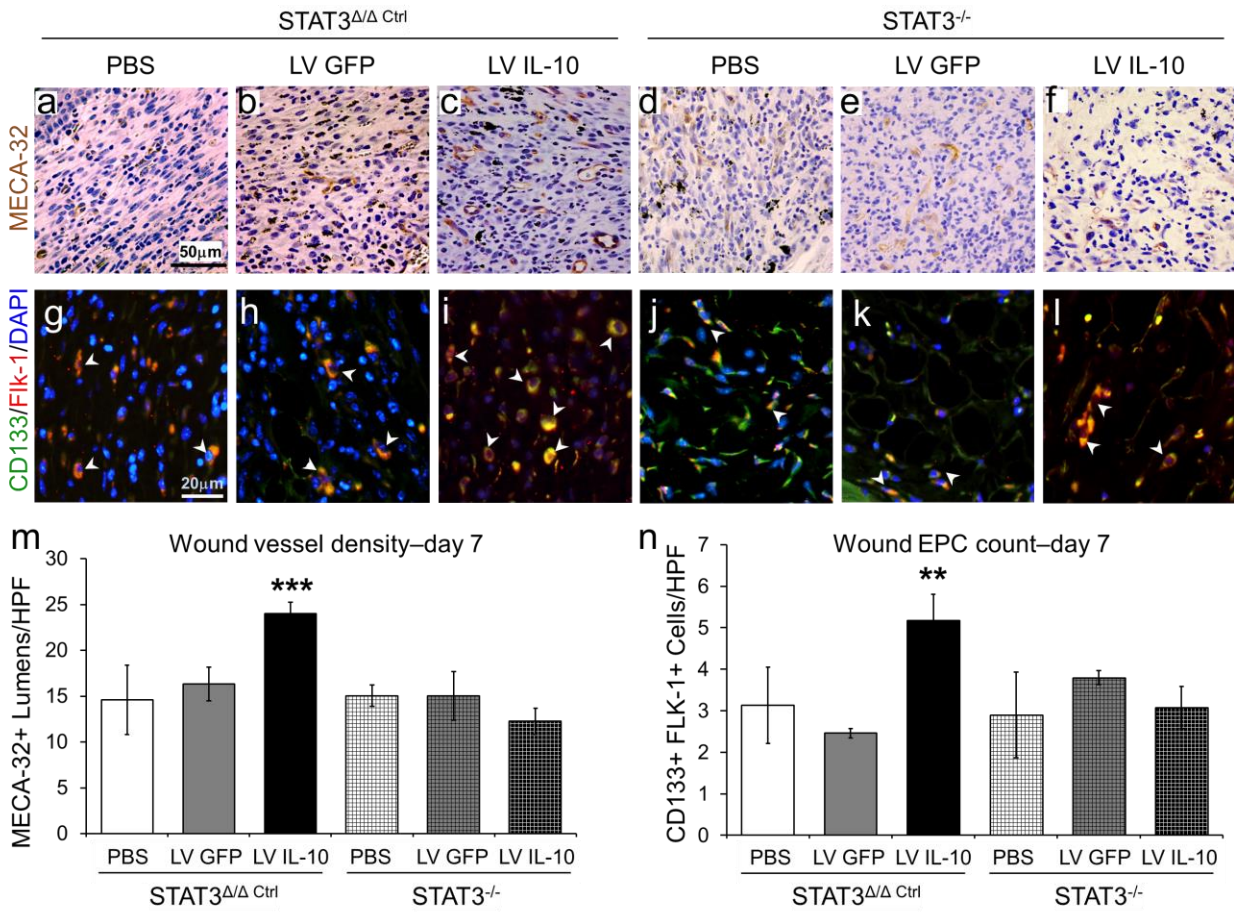



**Figure 4**

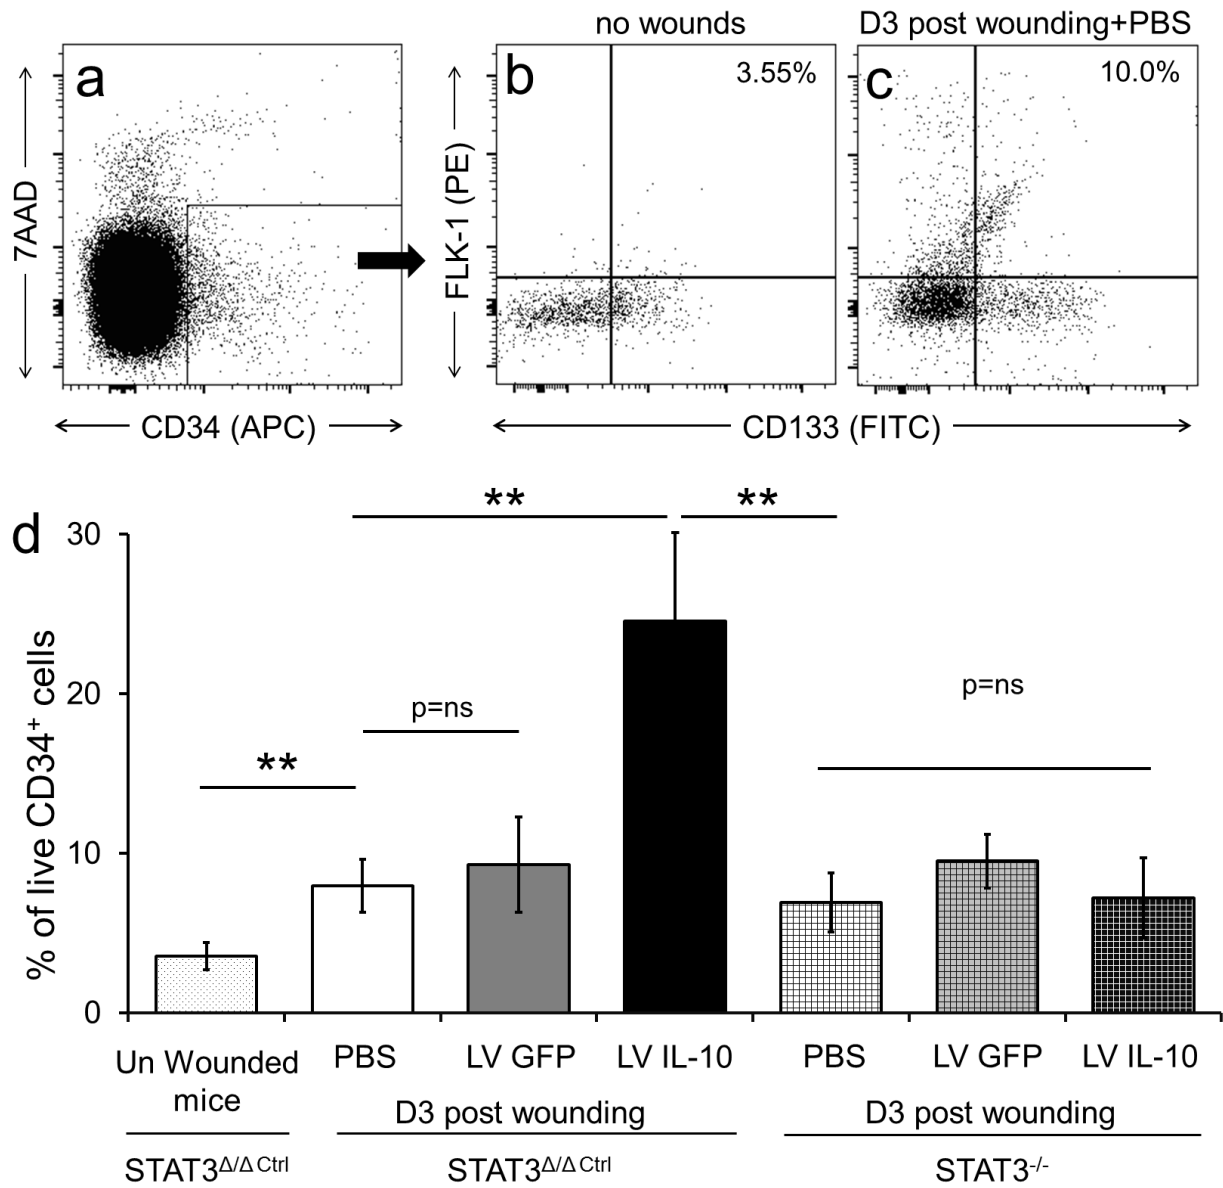

**Figure 5**

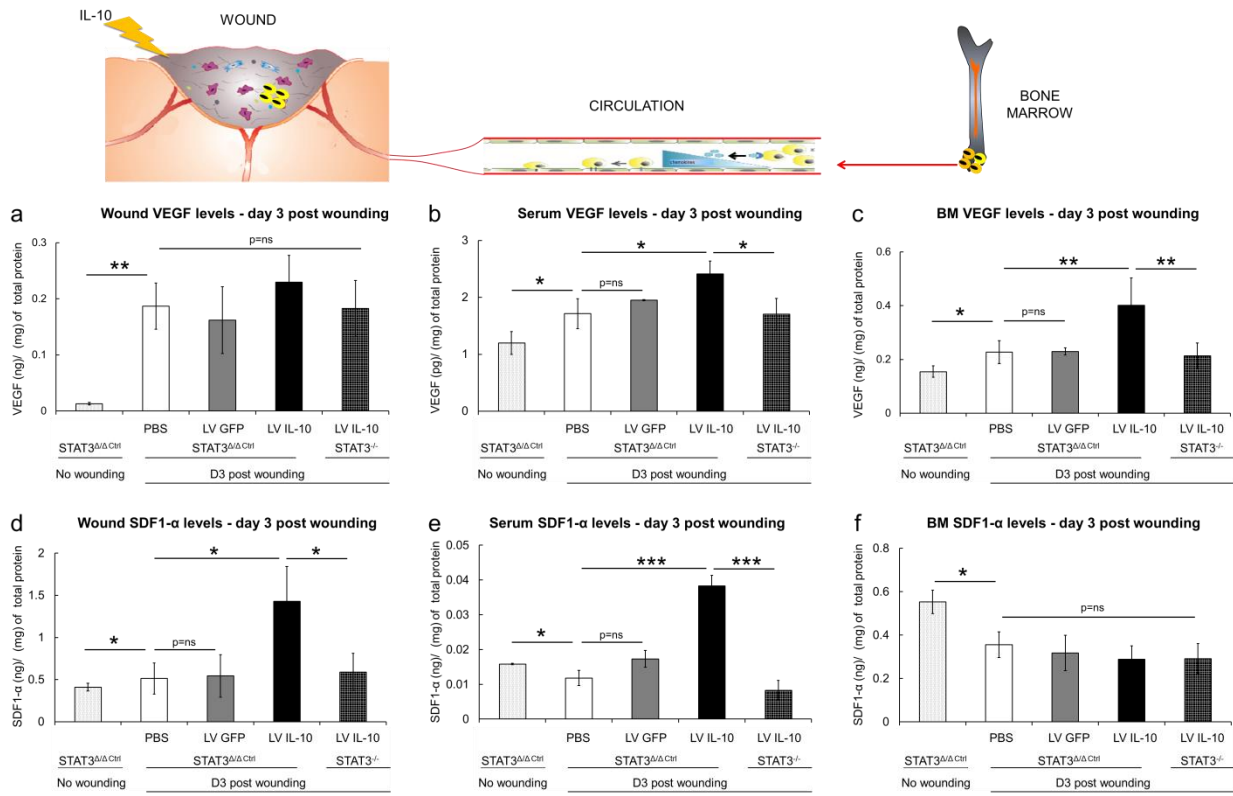

**Figure 6**

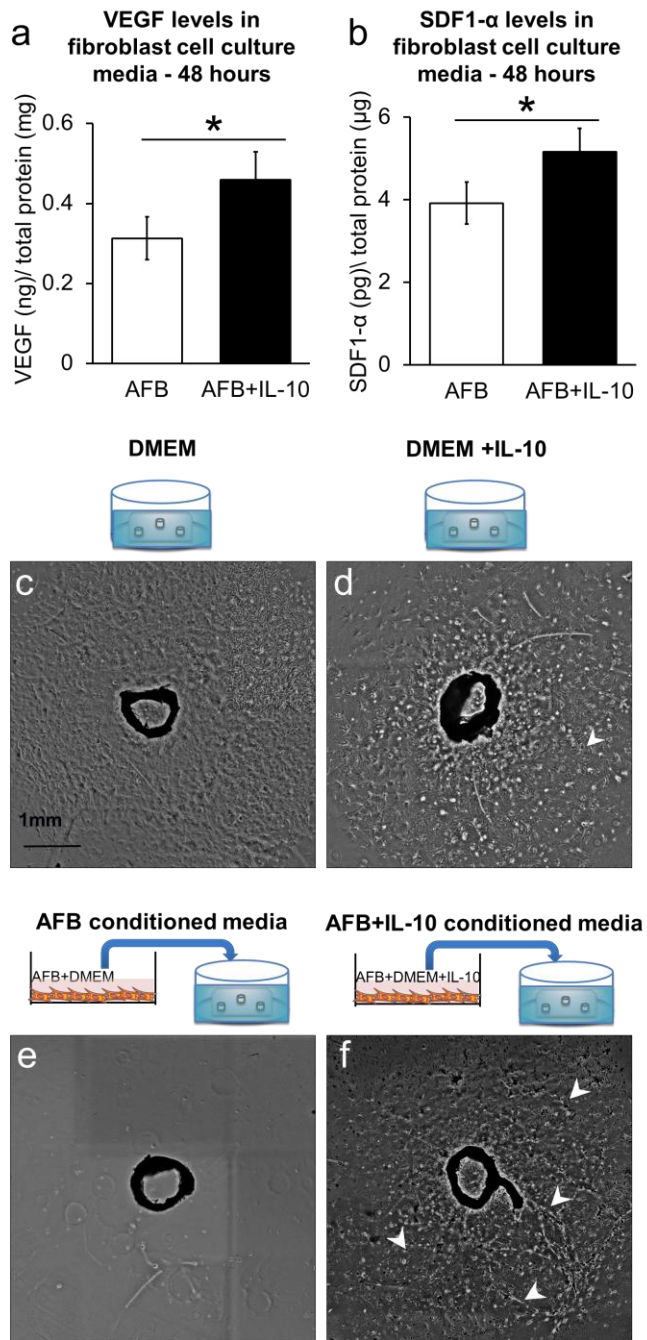

**Figure 7**

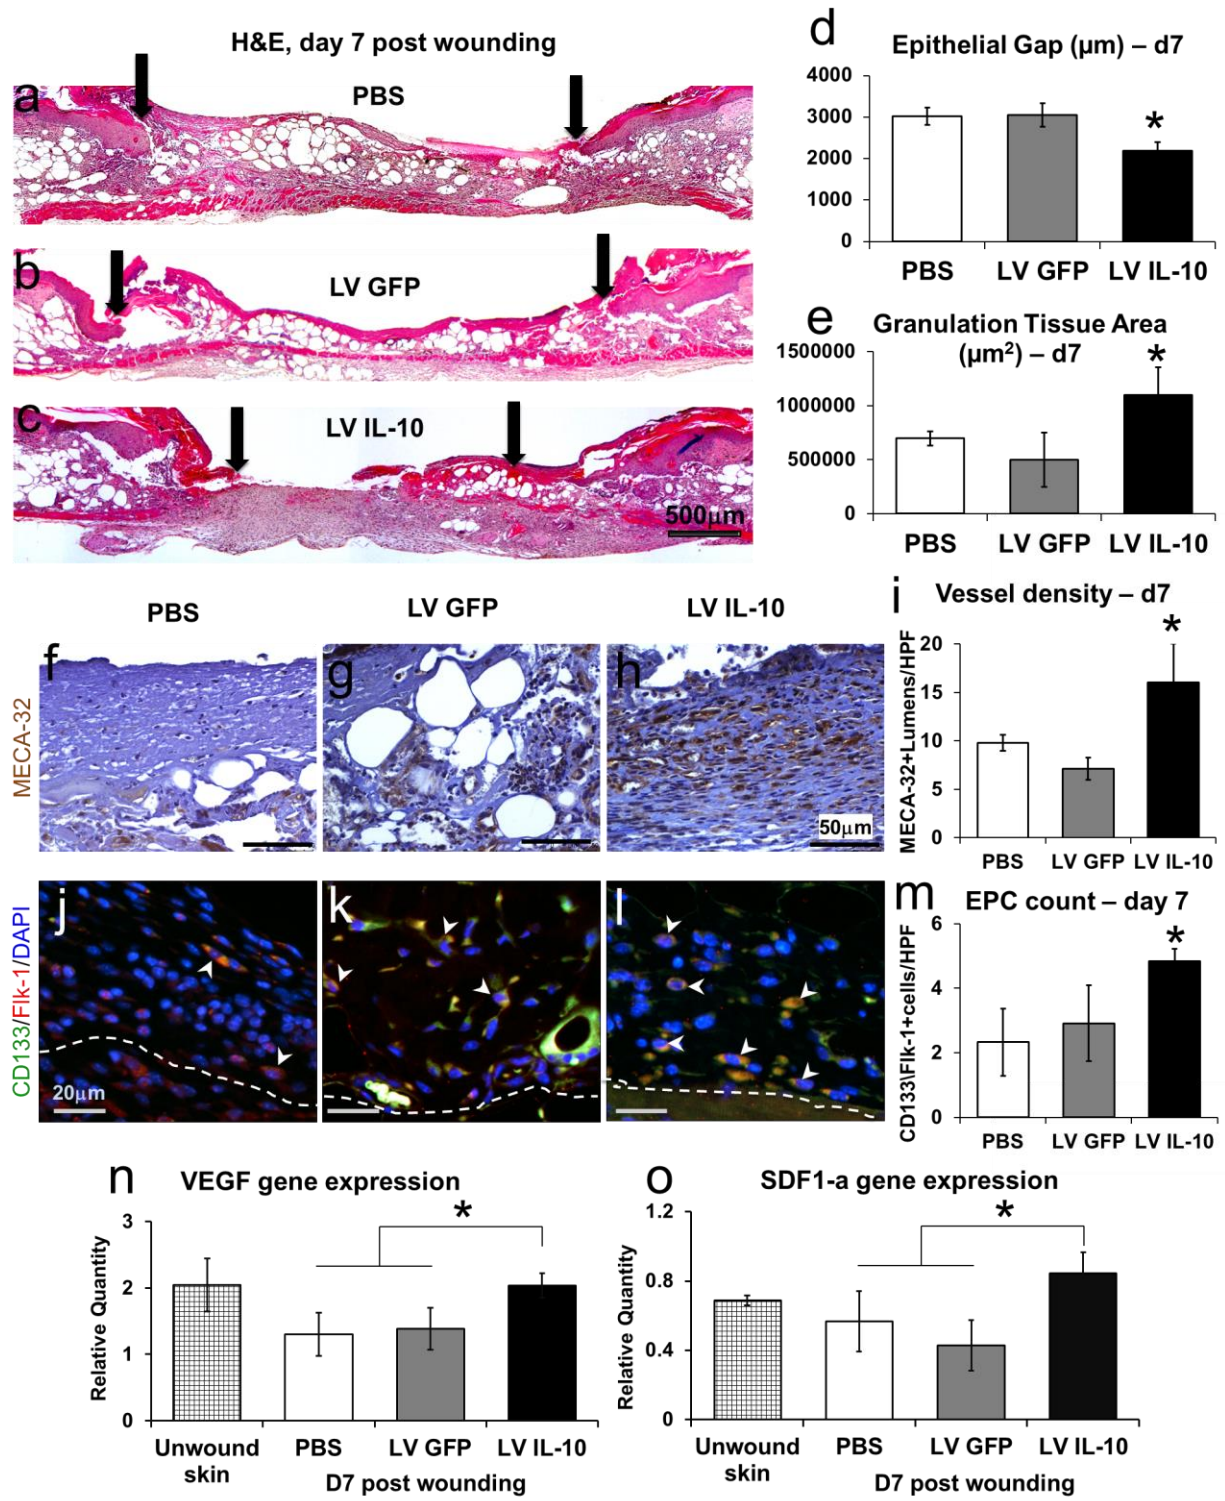

Figure 8

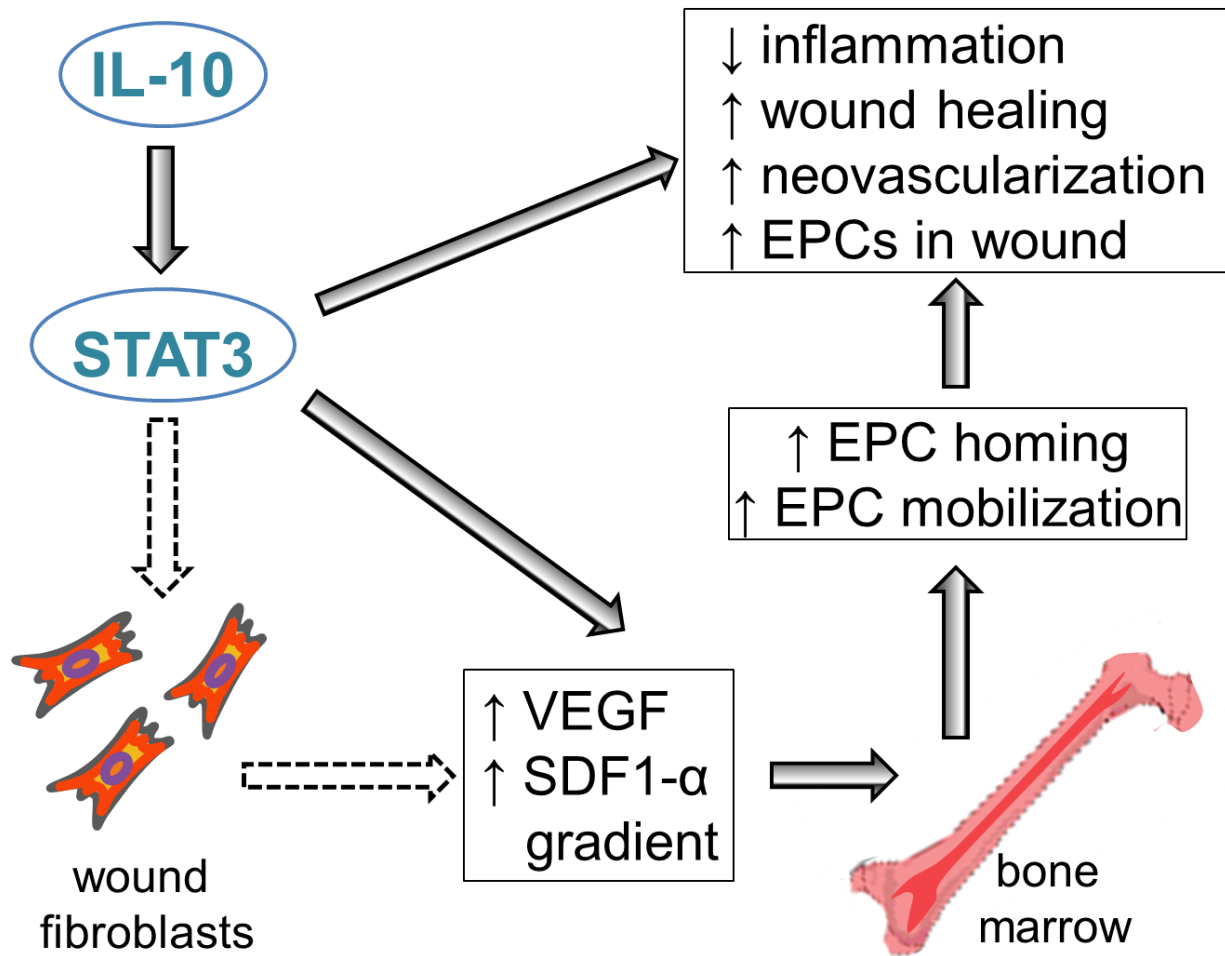

Source: https://www.biorxiv.org/content/10.1101/760165v1.full.pdf
